# **The fodder grass resources for ruminants: A indigenous treasure of local communities of Thal desert Punjab, Pakistan**

**Humaira Shaheen<sup>\*1,2</sup>, Rahmatuallah Qureshi<sup>3</sup>, Mirza Faisal Qaseem<sup>3</sup> and Piero Bruschi<sup>4</sup>**

COMSATS Institute of Information Technology<sup>1</sup>

South China Botanical Garden, Chinese Academy of Sciences, Guangzhou, PR China<sup>2</sup>

Pir Mehr Ali Shah Arid Agriculture University Rawalpindi<sup>3</sup>

University of Florence Italy<sup>4</sup>

[humaira.shaheen@comsats.edu.pk](mailto:humaira.shaheen@comsats.edu.pk), [hshaheen@scbg.ac.cn](mailto:hshaheen@scbg.ac.cn)

**Abstract:** Indigenous people have been using their regional grasses for rearing their animals for centuries. The present study is the first recorded traditional knowledge of grasses and feeding system for livestock from the Thal desert in Pakistan. Snowball method was used to identify key informants. Information was collected from 232 informants from six districts of Thal Desert through semi-structural questionnaire and site visits. The data was analyzed through Smith's salience index and Composite Salience using ANTHROPAC package in R software. On the whole 61 grasses were recorded from the study area and most of the species belongs to the Poaceae family (52 species). Based on palatability grasses were categorized into three major groups i.e. (A) High priority, (B) Medium priority and (C) Low priority. Species in Group A, abundantly present in the study area, highly palatable forage for all ruminants. 232(141M +91W) local informants were interviewed. Informants were grouped into three major age categories: 20–35 (48 informants), 36–50 (116 informants) and 51–67 years (68 informants). ANTHROPAC frequency analysis conformed the Smith's salience index and Composite Salience; *Cynodon dactylon* was the favorite species (6.46 SI, 0.6460 CS) followed by *Cymbopogon jwarancusa* (5.133 SI, 0.5133 CS) and *Sorghum* sp. was the third most salient species (5.121 SI, 0.5121 CS). Grasses were mostly available during the season of August and October and had also ethnoveterinary importance. This document about the traditional feeding of livestock from Thal Desert can strengthen the value of conserving our traditional knowledge, which was poorly documented before.

**Keywords:** Fodder, Thal Desert, livestock, pairwise comparison, ANTHROPAC

## **Introduction**

In rural areas of Pakistan, agro-pastoral activities play a crucial role in the development of the local economy, accounting for more than half of the total agricultural income and 10.6% of the national GDP [1]. These activities are particularly important in the economy of the country's desert regions where land cultivation is difficult and livestock is the main and often unique survival strategy and income source for the local communities. Moreover, milk and meat production may counteract the impact of climatic unpredictability on fluctuations in food availability, especially in areas facing frequent crop shortages. According to data reported by Farooq et al. [2], in Pakistan 8.1% of buffaloes, 13.5% of cattle, 15.3% of sheep and 14.4% of goats are raised in desert districts. However, husbandry in these areas is often an uncertain and low-paid activity; shortage of fodder as a result of severe climatic conditions, high rate of diseases, limited availability of veterinary services and poor access to animal vaccination are important constraints limiting the local livestock productivity [2]. The sustainable production of livestock under harsh climatic conditions needs efficient strategies for improving fodder utilization and management [3]. From this perspective, traditional knowledge can be an important source of information on local wild forage resources and on their nutritive properties. Several studies have shown that smallholder farmers in many parts of the world have a deep practical knowledge about the importance and quality of plants used to feed animals. Ethnobotanical investigations on fodder plants have been carried out in Africa [4-6], Brazil [7], India [8, 9] and China [10-12]. Many studies throughout the world highlight the diverse and abundant use of grasses and sedges as fodder [12, 13] [7, 8]; grasses and sedges are generally reported to be palatable and highly productive resources and to have a high forage potential especially in arid and semiarid areas [7]. Previous studies have shown that Thal is rich in grasses and sedges [14]; most of the grasses used by local population as fodder [15]. However, no detailed study has carried out to analyze utilization and selection strategies of these plants by shepherds and farmers living in this zone. Extensive areas in the Thal have been overgrazed and they are now strongly threatened by desertification processes [16, 17]. Understanding the relative importance and preference of different species is crucial for a sustainable management of the local forage resources and can help animal husbandry technicians to optimize the selection of useful fodder species and to improve the livestock system efficiency.

Moreover, recording this knowledge would be a much faster and cheaper method for learning about palatability and nutritive value of these plants.

The major aims of this study were:

- 1) To document traditional knowledge about the use of grasses and sedges as fodder in Thal and to assess similarities and differences with the studies previously conducted in the same [15] and in neighboring areas [11, 12].
- 2) To evaluate the impact of socioeconomic factors on the local ethnobotanical knowledge
- 3) To rank, by order of preference, the different species used in the animal diet
- 4) To quantify the influence of seasonal variation on the availability of these plants as animal feed.

## Materials and Methods

### Area of study

The Thal desert is located between 31° 10' N and 71° 30' E in the Punjab province, Pakistan (Fig. 1). It is a subtropical sandy desert lying between the Indus River flood plains in the west and Jhelum and Chenab River flood plains in the east. About 50% of the Thal is under arid to hyper-arid climatic conditions (mean annual rainfall less than 200 mm) and the remaining half is characterized by semiarid climatic conditions (annual mean rainfall between 200 and 500 mm). Most of rainfall occurs between June and August. Average temperatures range between 3-8 °C in winter and 32 – 40 °C in summer. Wind erosion is a serious problem leading to the loss of topsoil and organic matter and damage to crop plants. This region is divided into six districts viz. Bhakkar, Khushab, Mianwali, Jhang, Layyah, and Muzaffargarh.

In Thal desert livestock is considered as a more secure source of income for small farmers and landless poor people. According to [18] the average herd size is 17 standard animal units. Livestock herds consist of animals of different age and sex; on average each farm has 22.8 goats, 16.7 sheep, 7 cattle, 2.51 buffaloes, 0.88 camels, 0.21 donkeys and 0.05 mules. Detailed information on grazing and stall feeding practiced in the area is given in [19].

## **Ethnobotanical survey**

Data were collected for two consecutive years (from March 2016 to March 2018) from Thal desert. Thal desert has six districts and we visited each district twice a year for data collection. Informants were selected by snowball-sampling technique [20] among village leaders, shepherds and both farm and domestic livestock caretakers. Formal ethical consent was obtained from all participants before the research started. Information was gathered by using different approaches i.e. group discussions with informants, individual semi-structured questionnaires and participant observation (Fig. 2) [21]. The questionnaires were drafted in the local language (*Seriki* and *Punjabi*) and included the following major questions: (i) Which grasses/sedges are used as fodder? (ii) Which grasses/sedges are the preferred feed of choice for cattle, sheep, camels, buffaloes, and goats? (iii) What is the palatability of the different used plants? (iv) Which plant part do animals consume? (v) What are the feeding habits of different animals? (vi) Which livestock feeding system does local people adopt: free grazing or cut and carry? (vii) Do the listed fodder plants have any ethnoveterinary use? (viii) What are their other indigenous uses?

In the second stage of the field research we used direct observation of livestock grazing habits to evaluate the palatability of different plants, animal preferences and the growth stages of plants at the time of grazing.

## **Collection and identification of plants**

Plant collection was performed with the help of local informers during the field survey. Identification of the gathered species was carried out by the herbarium specialist Dr. Mushtaq Ahmed from Quaid-i-Azam University Islamabad and by the taxonomist Dr. Humaira Shaheen (Fig. 3). Botanical nomenclature of species and families complies with online Flora of Pakistan ([http://www.efloras.org/flora\\_page.aspx?flora\\_id=5](http://www.efloras.org/flora_page.aspx?flora_id=5)) [22] and the herbarium specimens were kept in to the Botany Department of Pir Mehr Ali Shah University of Arid Agriculture.

## **Data analysis**

The most common method to measure relative abundance was visual assessment and observation of ethnobotanically important grasses in the study area[12]. Total study area

was almost 20,000 square kilometers. We randomly divided each district into 45-50 plots and plot size was (10X10m = 100m<sup>2</sup>). Results were constructed by percentage of relative abundance through the following formula;

$$RA = \frac{\text{Total percentage cover of species in all plots}}{\text{Number of plots estimated}} \times 100$$

Based on the abundance value, grasses were categorized into the following groups i.e.

Abundant, Common, Frequent, Occasional and Rare (Table 1).

Relative frequency of citation (RFC) was calculated to sort listed plants by priority order, using the following formula [23-25].

$$RFC = FC/N$$

Where FC is the number of informants that mentioned the fodder use of the species and N is the total number of informants included in the study.

Pairwise comparison (PWC) was also used to determine the priority order of the listed species [12]. Ten informants (5 key informants and 5 randomly selected) were chosen for the PWC. The participants were asked, one at a time, to select their preferred fodder plants from all possible pairs of species. Each species got a score of 1 if the participants selected it. The final score was obtained by adding the scores and ranking them.

Smith's salience index and Composite Salience [26] were used to judge species saliency by weighing the average of the inverse rank of a species across multiple free-lists where each list was weighed by the number of species in the list. ANTHROPAC [27] was used to generate Smith's salience indexes.

Pairwise ranking or comparison was used to evaluate the degree of preference or levels of importance. The values for use reports across the selected species were summed up and ranked. Ten informants (six key and four randomly taken informants) in the study area ranked grasses according to their use e.g. 1st, 2nd, 3rd, 4th and 5<sup>th</sup> respectively. Ranking can be used for evaluating the degree of preference or level of importance of selected plants [26, 28].

### **Socioeconomic factors**

In total, 232 local informants were interviewed (Table 2); 141 were men and 91 were women. A smaller number of female informants was expected and can be partially explained with the local cultural restrictions preventing women from working outside

their homes or farms. Informants were grouped into three major age categories: 20–35 (48 informants), 36–50 (116 informants) and 51–67 years (68 informants). With regard to the profession, 34% (36 females and 44 males) were shepherds, 26% (27 females and 33 males) were farmed livestock caretakers and 40% (28 females and 64 males) domestic livestock caretakers. Thirty-six (16%) of the interviewed people were illiterate, 24 (10%) never completed their primary education, 120 (52%) completed 5 years of primary school and 52 (22%) informants had middle education level (Fig. 4) [22].

## RESULTS AND DISCUSSION

### Use of fodder species

The informants reported the use of 61 plant species that were distributed into 40 genera and 3 botanical families. The most represented genus was *Cyperus* with 5 species, followed by *Cenchrus* and *Eragrostis* with 4 species each. Most species belonged to Poaceae family (51 species; 84% of the reported plants) while 8 species (13%) were categorized into Cyperaceae family. Typhaceae were represented by only one species: *Typha elephantina*. Fifty-five species (92% of the reported species) were classified as native and 5 (8%) as exotic. The following exotic species were reported by informants: *Chloris gayana*, *Imperata cylindrica*, *Paspalum dilatatum*, *Sorghum bicolor* and *Vetiveria zizanioides*. These results seem to reflect composition and distribution patterns of the local flora. In a floristic checklist of Thal desert, Shaheen et al. [22] observed that Poaceae was the leading family with 52 species. Of the 52 Poaceae naturally occurring in the area, 48 (94%) were reported to be used as fodder in our study; 5 were not cited by informants and 4 (*Brachiaria reptans*, *Eragrostis atrovirens*, *E. cilianensis*, *Themeda anathera*) were reported in our study but not in the floristic inventory. All the eight Cyperaceae cited were included in the study conducted by Shaheen et al. [14].

Our comparative analysis revealed 15 species that are used as fodder in all the considered studies. We found a mean similarity (Jaccard's index) rather high ( $36.4 \pm 6.9$ ) with values ranging from 30.8 (this study vs [11]) to 50.0 ([12] vs [11]). These studies are all from zones lying in the proximity of the study area that share not only similar ecological factors but also the same socioeconomic and cultural history. Nevertheless, our study

listed 20 grasses not previously reported for this area in the fodder category. These results provide an important contribution of novelty to the knowledge on wild fodder plants in Pakistan. At the same time, they also show the importance of collecting new ethnobotanical information even in areas already studied.

### **Socioeconomic factors**

Informants mentioned  $8.27 \pm 4.49$  taxa (range 1 – 18). Gender ( $H = 0.373$ ;  $P > 0.05$ ) and education ( $H = 5.29$ ;  $P > 0.05$ ) had no influence on the knowledge of fodder plants. Gender influence on traditional knowledge is controversial [29] and many studies have showed that the statistical strength of this relation depends on the local cultural context and on the categories of use that the researchers focus on. A lack of differentiation between men and women, as observed in this study, could mean that there is not a clear division of labor in the area. A similar finding was observed by Aumeeruddy et al. [30] in Northern Pakistan, where women have a detailed knowledge on characteristics and properties of the different fodder species, suggesting that they fully share with men the responsibility of livestock rearing and forage collection. Khan and Khan [31] observed that most of the women of Cholistan desert have an important role in managing livestock, spending almost 8 to 13 hours a day in this activity. Differently Nunes et al. [7] and Bruschi et al. [6] showed that men prevail in the knowledge about fodder plants. The greater male knowledge found in these two studies may be explained by different gender-based experiences and skills: men spend much of their time moving with their herds while women are more frequently involved in managing food and family care. The age of informants resulted to be statistically significant ( $H = 9.97$ ;  $P < 0.05$ ). As also shown in many other ethnobotanical studies [32]; [33]; [34], elderly people seem to retain more traditional knowledge on the use of plants. For young people (25 – 35 years old), the average number of known fodder plants was  $6.65 \pm 4.12$  while for middle-aged (36 – 50) and elderly informants ( $> 50$ ) there was an average number of  $8.25 \pm 4.13$  and  $9.42 \pm 4.74$ , respectively. Occupation also strongly affected the number of fodder species reported by informants ( $H = 14.58$ ;  $P < 0.01$ ). Domestic livestock caretakers mentioned a higher number of plants ( $9.50 \pm 4.43$ ) followed by farmed livestock caretakers ( $7.98 \pm 4.02$ ) and shepherds ( $7.10 \pm 4.60$ ). Domestic livestock caretakers spend much time with cattle; therefore have a better knowledge about the animals' favorite foods.



## Pairwise ranking of wild palatable plants

*Cymbopogon jwarancusa* subsp. *jwarancusa* with 1<sup>st</sup> rank was the most preferred species among all selected grass species, followed by *Cynodon dactylon*, *Cenchrus ciliaris*, *Typha elephantina* and *Cyperus alopecuroides* which had 2<sup>nd</sup>, 3<sup>rd</sup>, 4<sup>th</sup> and 5<sup>th</sup> rank respectively. *Pycnus flavidus* received the lowest score, therefore resulting as the less preferred species (Table 3). The most highly ranked species (*Cymbopogon jwarancusa* subsp. *jwarancusa*, *Cynodon dactylon*, *Cenchrus ciliaris*, *Typha elephantina* and *Cyperus alopecuroides*) are also the most dominant in the area (Shaheen, unpublished data). This finding seems to support the “appearance hypothesis” under which the most abundant species are better known and mostly used Lucena et al. [35]. Plants commonly growing in given area would allow local people to have more experience of their properties and consequently would have a greater probability of being introduced into the local culture.

## Co-relation used for pairwise comparison

On the basis of RFC value, pairwise comparison was used to correlate fodder grasses and the knowledge of the respondent. Ten out of 232 respondents were chosen on the basis of their profession (ethnoveterinary practitioner) but were potential respondents due to enough indigenous knowledge. Based on RFC values knowledge of respondent R1 showed a strong correlation with R4, as R2 (0.56;  $p < 0.001$ ) showed with R1 with R7 (0.55;  $p < 0.001$ ), R2 have strong correlation with R3 and R8 (0.48, 0.58;  $p < 0.001$ ) but R2 had the strongest correlation with R9 (0.71;  $p < 0.001$ ). All correlation and their distribution of RFC values are shown in Fig. 5. The positive correlation between respondents suggests that respondents report similar information about the plant, for example, R2 and R9 both were an ethnoveterinary practitioner with age more than 50 so they have similar knowledge.

## Availability and Prioritizing fodder grasses on the basis of RFC and PWC

RCF values ranged from 1 to 0.51 with a mean value of 0.71. Twenty-five species had RFC values higher than average value while the remaining 35 species had RFC value lower than the average value (Fig. 6, Table 4). *Cymbopogon jwarancusa* and *Cynodon dactylon* showed the highest value (1.00) while *Imperata cylindrical* (0.52) and *Vetiveria*



*zizanioides* (0.51) had the lowest values. Based on these RFC values fodder species were included into three categories of priority: species with higher priority (group A), species with medium priority (group B) and species with low priority (group C). Twenty-eight (45.9%) species were highly preferred by the informants followed by twenty-three (37.7%) species that had medium priority while ten (16.3%) grass species were the least preferred (Fig 7). Values ranged between 1-0.69 for group A, between 0.69-0.54 for group B and between 0.54-0.51 for group C. Similar results were shown by Harun et al. [12] in their study. These results were confirmed by cluster analysis based on RFC in which the reported species were classified into three major groups compliant with the results of priority ranking analysis. Similar results were found when we performed cluster analysis using PWC data. *Cymbopogon jwarancusa* was the preferred species in both approaches (Table 5).

The species included in the Group A (high priority) is ecologically dominant and largely available in the area. Moreover, taxa included in this group have a good palatability and are also available during the dry season when other grazing resources are exhausted. .

### **Palatability of grasses and the method of feeding**

Preferred palatability species are often leafy and without lots of stem, with a high leaf table and leaves of low tensile strength [36, 37]. Palatability analysis showed that 77% of the reported species are grazed in the study area (Table 6). In particular; grasses included in group A of the priority ranking were consumed by all ruminants locally raised. Goats are the only animals to feed on every type of grass growing in Thal desert although palatability results show a preference for 58% of the reported species. 40% of the species represented the favorite fodder for sheep and 26% the favorite fodder for buffaloes. Camels are very selective animals and use only few specific grasses as fodder (Fig. 8). Different parts showed to have different edibility: for example 42% of grass species were consumed as whole plant (e.g. *Cynodon dactylon*, *Eragrostis minor*, *Cenchrus ciliaris*, *Cenchrus pennisetiformis* etc) while 38% and 19% of them were consumed as aerial parts and as leaves, respectively. The reason why so many grasses are grazed as a whole is probably related to their small size and tender herbaceous texture (e.g. *Cynodon dactylon*, *Lasiurus indicus*, *Phalaris minor*, *Cyperus rotundus*, *Eragrostis minor* etc) similar results shown in other literature [12] [13]. Due to the sandy nature of soils occurring in the study

area these plants have shallow root systems and can easily be pulled out from the soil. Species growing in the form of dense patch are hard to be consumed as a whole plant and animals can enjoy feeding only with the aerial parts of this grass. Beliefs on the feeding habit of the livestock are common in the area: for example, some local shepherds reported that putting the herd out to pasture in open field improves their health and milk production. According to them animals freely grazing are able to select the better grasses avoiding the toxic or less nutritious ones. They justify their belief by comparing milk production of freely grazing animals with cattle fed with forage and also by saying that during dry season, when free grazing is not possible, there is a considerable reduction in animal health and milk production. As Provenza et al describe in their study [38].

### **Role of the fodder species on milk production**

Ten out of the 80 interviewed shepherds (based on the informant knowledge) were randomly sampled to analyze more in detail the role of fodder species on the milk production. We focused our attention on the shepherds because, during the interviews, they showed a deeper knowledge about the species influencing quantity and quality of milk. According to them, *Cynodon dactylon* was the favorite species for the milk production (6.46 SI, 0.6460 CS) followed by *Cymbopogon jwarancusa* (5.133 SI, 0.5133 CS). *Cymbopogon jwarancusa* was also reported to give a peculiar aroma, increasing the milk's value. *Sorghum* sp. was the third most salient species (5.121 SI, 0.5121 CS) (Table 7). This findings were confirmed when we extended our analysis to all the informants. According to the results of the ANTHROPAC frequency analysis, ranking the plants in the order of their citation frequency (Fig. 9), *Cynodon dactylon* had 73.21% frequency of milk production, following by *Cymbopogon jwarancusa* (70.54%) and *Sorghum* sp. (67.86%).

### **Relative abundance and seasonal availability**

Relative abundance analysis showed that most of the cited species (55%) were abundantly present in the study area and most of them belonged to the priority Group A (Fig.10). 13.39% of the species were available in August and in October while 12.54 % were available in July. In Pakistan, July, August and October are months characterized by

monsoon rains fostering the grass biomass development (Fig.11).

### **People use Livestock for improving their economic life**

Livestock production makes the main contribution to agriculture value-added services in the study area. Ten local informants were asked to rank animals from one to five on the basis of their economic value. Milk production is the major income source for people living in the Thal desert; mostly person raised cows and buffaloes more for milk production as compare to raise camels or goats (Fig. 12). Goats, sheep, buffaloes and cows are also raised for meat production. During religious celebrations (such as pilgrimages and *Eid ul Azha*) shepherds and farmers take livestock to the local market for sale and this is another major income source as also shown in [39]. Skin from sheep, buffaloes, cows and camels are also an other way of earning, people sale the animal skin for making leather goods; teeth and bones are used for making different objects (e.g. buttons, jewelry and decoration pieces) (Fig. 12). Dung of buffaloes and cows is dried and used as fuel or, fresh, as a natural fertilizer to improve the soil fertility. Ox, buffaloes and sometimes camels are used for ploughing. Camels are commonly used for transportation in desert areas.

### **Indigenous uses and Ethno-veterinary uses of grasses**

Eighteen of the 61 reported species were locally used in ethno-veterinary practice. *Cymbopogon jwarancusa* was the most cited veterinary grass (48) and was reported to heal infertility and skin diseases in ruminants (Table 8). Other species (*Cenchrus* spp., *Arundo donax*, *Desmostachya bipinnata*, *Dichanthium annulatum*, *Digitaria ciliaris*, *Eleusine indica*, *Eragrostis* spp., *Saccharum spontaneum*) were frequently reported to treat urinary and digestive diseases in livestock. As similar results shown in different studies [12, 16, 40]. Urinary and digestive diseases were the most frequently reported disorders; this finding is probably due to the sandy nature of the soil, causing the accumulation of sand-laden feed material in the digestive apparatus and in the urinary tract of livestock.

### **Conclusion:**

The present study is the detailed inventory of 61 indigenous grass species used for fodder and ethno veterinary in Thal district of Southern Punjab Pakistan. The data about grasses

was obtained from 232 local informants belonging to different age groups and professions these informants ranked *Cymbopogon jwarancusa* and *Cynodon dactylon* as most preferred grass species. The present study provides an inventory, list of plant parts and diversity in palatability and feeding behavior of these grasses. The data analysis highlighted the possible motives behind the greater acceptability ratio of high priority fodder grasses i.e. diversity in their palatability for major ruminant species, abundant availability in the study area and versatile feeding methods. This data enriched study is not only significant for the conservation of ethnobotanical knowledge but also it may help in facilitating the sustainable livestock feeding for ruminants. Subsequently, the information may play a major role in improving the livelihood of smallholder farmers. Furthermore, it is the first study, which use Smith's salience index and Composite Salience index to authenticate and validate the collected information. Blend of traditional and scientific knowledge is essentially required to produce worthwhile criterion for selecting these fodder grasses. If some of the grasses show promising nutritional and pharmacological value, then relevant policy maker should take necessary steps to conserve the area and the species. It should not only beneficial for the pharmaceutical companies; it will also help to boost up the economy of the country.

### **Declaration:**

- **Acknowledgements**

We acknowledge all the informants of the study area to for their support and hospitality, We are really very grateful to Director of Camel form Dr. Asharaf and Director of Mani form Dr. Razaq for their support and giving permission to explore the area for data collection. I am very thankful to HEC Pakistan for their kind support for providing travel grant.

- **Funding**

I am thankful to Higher Education Commission of Pakistan (HEC) for travel funding to partially covering the costs of processing the data. Costs of this project were managed personally. No external funding resources were available for this particular study.

### **Availability of data and materials**

Voucher specimens were submitted to the Herbarium of PMAS-AAUR Pakistan for forthcoming uses (Table 3).

373 **Authors' contributions**

374 The ethnobotanical survey and fodder grass sample collection were done by SH, QR, and  
 375 QFM. QFM did the statistical analysis and SH wrote the manuscript by providing a  
 376 critical interpretation of the outputs. QR supervised the whole study and helped in  
 377 identification of specimens. All authors read and approved the final manuscript.

378 **Ethics approval and consent to participate**

379 **Consent for publication**

380 Not applicable.

381 **Competing interests**

382 Authors declare that they have no competing interests.

383

## 384 **Legend of figures**

385 Fig. 1: Map of the area Thal, Desert

386 Fig. 2: Ethnobotanical survey and data collection

387 Fig. 3: Different steps for collection and identification of Grasses

388 Fig. 4: Summary of education levels of informants

389 Fig. 5: Co-relation used for pairwise comparison for different grasses

390 Fig. 6 Prioritizing of fodder grasses on the bases of RFC

391 Fig. 7: Cluster analysis for grouping of ethno botanically used fodder grasses

392 Fig. 8: Animals Preferences of grasses

393 Fig. 9: Frequency of milk producing species according to informants ranking

394 Fig. 10. Percentage of species in each group

395 Fig. 11: Availability of the grasses in the study area

396 Fig. 12: People use Livestock for improving their economic life in Thal Desert

## 397 **Legend of Tables**

398 Table 1: Relative abundance categories and Coverage in the study area

399 Table 2: Demography of informants of the study area

400 Table 3: Pair wise ranking of wild palatable plants from all districts of Thal

401 Table 4: List of the collected grasses, Ethnobotanical, Ethno veterinary data, abundance;  
402 focal persons count (FC) and relative frequency citation (RFC) of fodder grasses of area  
403 of Thal desert, Punjab Pakistan

404 Table 5: Pairwise comparison (PWC) base on similar RFC vales of fodder grasses

405 Table 6: Frequency analysis for palatability, parts used for eating and feeding methods  
406 and relative abundance of fodder grasses

407 Table 7: Results of ANTHROPAC analysis of overall salience index of milk producing  
408 species

409 Table 8: Grasses use in Ethnoveterinary and Ethnobotanical

410

411

412

413

414

415

416

- 417 1. Ghazali A. Analyzing the relationship between foreign direct investment  
418 domestic investment and economic growth for Pakistan. *International Research*  
419 *Journal of Finance and Economics*. 2010;47(1):123-31.
- 420 2. Farooq U, Ahmad M, Saeed I. Enhancing livestock productivity in the desert  
421 ecologies of Pakistan: setting the development priorities. *Pakistan Development*  
422 *Review*. 2009;48(4):795-823.
- 423 3. Hussain F, Durrani MJ. Seasonal availability, palatability and animal  
424 preferences of forage plants in Harboi arid range land, Kalat, Pakistan. *Pakistan*  
425 *Journal of Botany (Pakistan)*. 2009.
- 426 4. Okoli I, Ebere C, Uchegbu M, Udah C, Ibeawuchi I. A survey of the diversity of  
427 plants utilized for small ruminant feeding in south-eastern Nigeria. *Agriculture,*  
428 *ecosystems & environment*. 2003;96(1-3):147-54.
- 429 5. Bahru T, Asfaw Z, Demissew S. Ethnobotanical study of forage/fodder plant  
430 species in and around the semi-arid Awash National Park, Ethiopia. *Journal of*  
431 *forestry research*. 2014;25(2):445-54.
- 432 6. Bruschi P, Urso V, Solazzo D, Tonini M, Signorini MA. Traditional knowledge  
433 on ethno-veterinary and fodder plants in South Angola: an ethnobotanic field survey  
434 in Mopane woodlands in Bibala, Namibe province. *Journal of Agriculture and*  
435 *Environment for International Development (JAEID)*. 2017;111(1):105-21.
- 436 7. Nunes AT, Lucena RFP, dos Santos MVF, Albuquerque UP. Local knowledge  
437 about fodder plants in the semi-arid region of Northeastern Brazil. *Journal of*  
438 *ethnobiology and ethnomedicine*. 2015;11(1):12.
- 439 8. Singh V, Gaur R, Bohra B. A survey of fodder plants in mid-altitude Himalayan  
440 rangelands of Uttarakhand, India. *Journal of Mountain Science*. 2008;5(3):265-78.
- 441 9. Nautiyal S. Interactions Between Humans and Ecosystems in Himalayas of  
442 India and Its Socioeconomic and Ecological Consequences: An Ecological Modelling  
443 Approach. *Ecosystem Functions and Management*: Springer; 2017. p. 39-57.
- 444 10. Abdullah M, Rafay M, Hussain T, Ahmad H, Tahir U, Rasheed F, et al.  
445 NUTRITIVE POTENTIAL AND PALATABILITY PREFERENCE OF BROWSE FOLIAGE  
446 BY LIVESTOCK IN ARID RANGELANDS OF CHOLISTAN DESERT (PAKISTAN). *JAPS,*  
447 *Journal of Animal and Plant Sciences*. 2017;27(5):1656-64.
- 448 11. Zareen A, Khan Z, Ajaib M. Ethnobotanical evaluation of the shrubs of Central  
449 Punjab, Pakistan. *Biologia (Pakistan)*. 2013;59(1):139-47.
- 450 12. Harun N, Chaudhry AS, Shaheen S, Ullah K, Khan F. Ethnobotanical studies of  
451 fodder grass resources for ruminant animals, based on the traditional knowledge of  
452 indigenous communities in Central Punjab Pakistan. *Journal of ethnobiology and*  
453 *ethnomedicine*. 2017;13(1):56.
- 454 13. Geng Y, Hu G, Ranjitkar S, Wang Y, Bu D, Pei S, et al. Prioritizing fodder  
455 species based on traditional knowledge: a case study of mithun (*Bos frontalis*) in  
456 Dulongjiang area, Yunnan Province, Southwest China. *Journal of ethnobiology and*  
457 *ethnomedicine*. 2017;13(1):24.



- 458 14. Shaheen H, Qureshi R, Iqbal S, Qasem MF. Seasonal availability and  
459 palatability of native flora of Santh Saroola Kotli Sattian, Rawalpindi, Pakistan.  
460 African Journal of Plant Science. 2014;8(2):92-102.
- 461 15. Khalil AT, Shinwari ZK, Qaiser M, Marwat KB. Phyto-therapeutic claims about  
462 euphorbeaceous plants belonging to Pakistan; an ethnomedicinal review. Pak J Bot.  
463 2014;46(3):1137-44.
- 464 16. Abbasi AM, Khan MA, Shah MH, Shah MM, Pervez A, Ahmad M.  
465 Ethnobotanical appraisal and cultural values of medicinally important wild edible  
466 vegetables of Lesser Himalayas-Pakistan. J Ethnobiol Ethnomed. 2013;9(1):66. Epub  
467 2013/09/17. doi: 10.1186/1746-4269-9-66. PubMed PMID: 24034131; PubMed  
468 Central PMCID: PMCPMC3853161.
- 469 17. Khan M, Khan MA, Mujtaba G, Hussain M. Ethnobotanical study about  
470 medicinal plants of Poonch valley Azad Kashmir. J animal plant Sci. 2012;22:493-  
471 500.
- 472 18. Hussain I. Profile of Livestock Production in Thal Desert of Pakistan.  
473 International Journal of Academic Research in Business and Social Sciences.  
474 2017;7(3):480-94.
- 475 19. FARAZ A, WAHEED A, YAQOOB M, MIRZA R. Camel Production Profile in  
476 Desert Ecosystem of Thal, Punjab. Sindh University Research Journal-SURJ (Science  
477 Series). 2019;51(01):45-52.
- 478 20. Waters J. Snowball sampling: a cautionary tale involving a study of older drug  
479 users. International Journal of Social Research Methodology. 2015;18(4):367-80.
- 480 21. Shaheen H, Qaseem MF, Amjad MS, Bruschi P. Exploration of ethno-medicinal  
481 knowledge among rural communities of Pearl Valley; Rawalakot, District Poonch  
482 Azad Jammu and Kashmir. PloS one. 2017;12(9):e0183956.
- 483 22. Shaheen H, Qureshi R, Qaseem MF, Amjad MS, Bruschi P. The cultural  
484 importance of indices: A comparative analysis based on the useful wild plants of  
485 Noorpur Thal Punjab, Pakistan. European Journal of Integrative Medicine.  
486 2017;12:27-34.
- 487 23. Shaheen H, Qureshi R, Akram A, Gulfraz M. Some important medicinal flora of  
488 Noorpur Thal, Khushab, Pakistan. Archives Des Sciences. 2012;65(2):57-73.
- 489 24. Ashfaq S, Ahmad M, Zafar M, Sultana S, Bahadur S, Abbas N. Medicinal plant  
490 biodiversity used among the rural communities of arid regions of northern Punjab,  
491 Pakistan. 2019.
- 492 25. Nadaf M, Joharchi M, Amiri MS. Ethnomedicinal uses of plants for the  
493 treatment of nervous disorders at the herbal markets of Bojnord, North Khorasan  
494 Province, Iran. Avicenna journal of phytomedicine. 2019;9(2):153.
- 495 26. Qaseem M, Qureshi R, Amjad M, Ahmed W, Masood A, Shaheen H. ETHNO-  
496 BOTANICAL EVALUATION OF INDIGENOUS FLORA FROM THE COMMUNITIES OF  
497 RAJH MEHAL AND GOI UNION COUNCILS OF DISTRICT KOTLI, AZAD JAMMU  
498 KASHMIR PAKISTAN. APPLIED ECOLOGY AND ENVIRONMENTAL RESEARCH.  
499 2019;17(2):2799-829.
- 500 27. Nankaya J, Nampushi J, Petenya S, Balslev H. Ethnomedicinal plants of the  
501 Loita Maasai of Kenya. Environment, Development and Sustainability. 2019:1-21.

28. Tounekti T, Mahdhi M, Khemira H. Ethnobotanical Study of Indigenous Medicinal Plants of Jazan Region, Saudi Arabia. Evidence-Based Complementary and Alternative Medicine. 2019;2019.
29. Torres-Aviles W, Medeiros PMd, Albuquerque UP. Effect of gender on the knowledge of medicinal plants: systematic review and meta-analysis. Evidence-Based Complementary and Alternative Medicine. 2016;2016.
30. Aumeeruddy-Thomas Y, Shinwari Z, Abdullah A, Khan A. Ethnobotany and the management of fodder and fuelwood at Ayubia National Park, North West Frontier Province, Pakistan. People and Plants working paper. 2004;(13).
31. Khan AA, Khan K. Women's Role in Livestock Economy of Cholistan Desert, Pakistan. Global Journal of Human-Social Science Research. 2015.
32. Voeks RA, Leony A. Forgetting the forest: assessing medicinal plant erosion in eastern Brazil. Economic Botany. 2004;58(sp1):S294-S306.
33. Upadhyay B, Roy S, Kumar A. Traditional uses of medicinal plants among the rural communities of Churu district in the Thar Desert, India. Journal of ethnopharmacology. 2007;113(3):387-99.
34. de Melo JG, Santos AG, de Amorim ELC, Nascimento SCd, de Albuquerque UP. Medicinal plants used as antitumor agents in Brazil: an ethnobotanical approach. Evidence-based complementary and alternative medicine. 2011;2011.
35. de Lucena RFP, de Medeiros PM, de Lima Araújo E, Alves AGC, de Albuquerque UP. The ecological apparency hypothesis and the importance of useful plants in rural communities from Northeastern Brazil: An assessment based on use value. Journal of Environmental Management. 2012;96(1):106-15.
36. Albuquerque UP, Lucena RF, Monteiro JM, Florentino AT, Almeida CdFC. Evaluating two quantitative ethnobotanical techniques. 2006.
37. Meissner H. Recent research on forage utilization by ruminant livestock in South Africa. Animal Feed Science and Technology. 1997;69(1-3):103-19.
38. Provenza FD, Villalba JJ, Dziba L, Atwood SB, Banner RE. Linking herbivore experience, varied diets, and plant biochemical diversity. Small ruminant research. 2003;49(3):257-74.
39. Haleem S. Pakistan-Culture Smart!: The Essential Guide to Customs & Culture: Bravo Limited; 2013.
40. Moreki JC. Documentation of ethnoveterinary practices used in family poultry in Botswana. Vet World. 2013;6(1):18-21.

bioRxiv preprint doi: <https://doi.org/10.1101/796227>; this version posted October 7, 2019. The copyright holder for this preprint (which was not certified by peer review) is the author/funder, who has granted bioRxiv a license to display the preprint in perpetuity. It is made available under aCC-BY 4.0 International license.

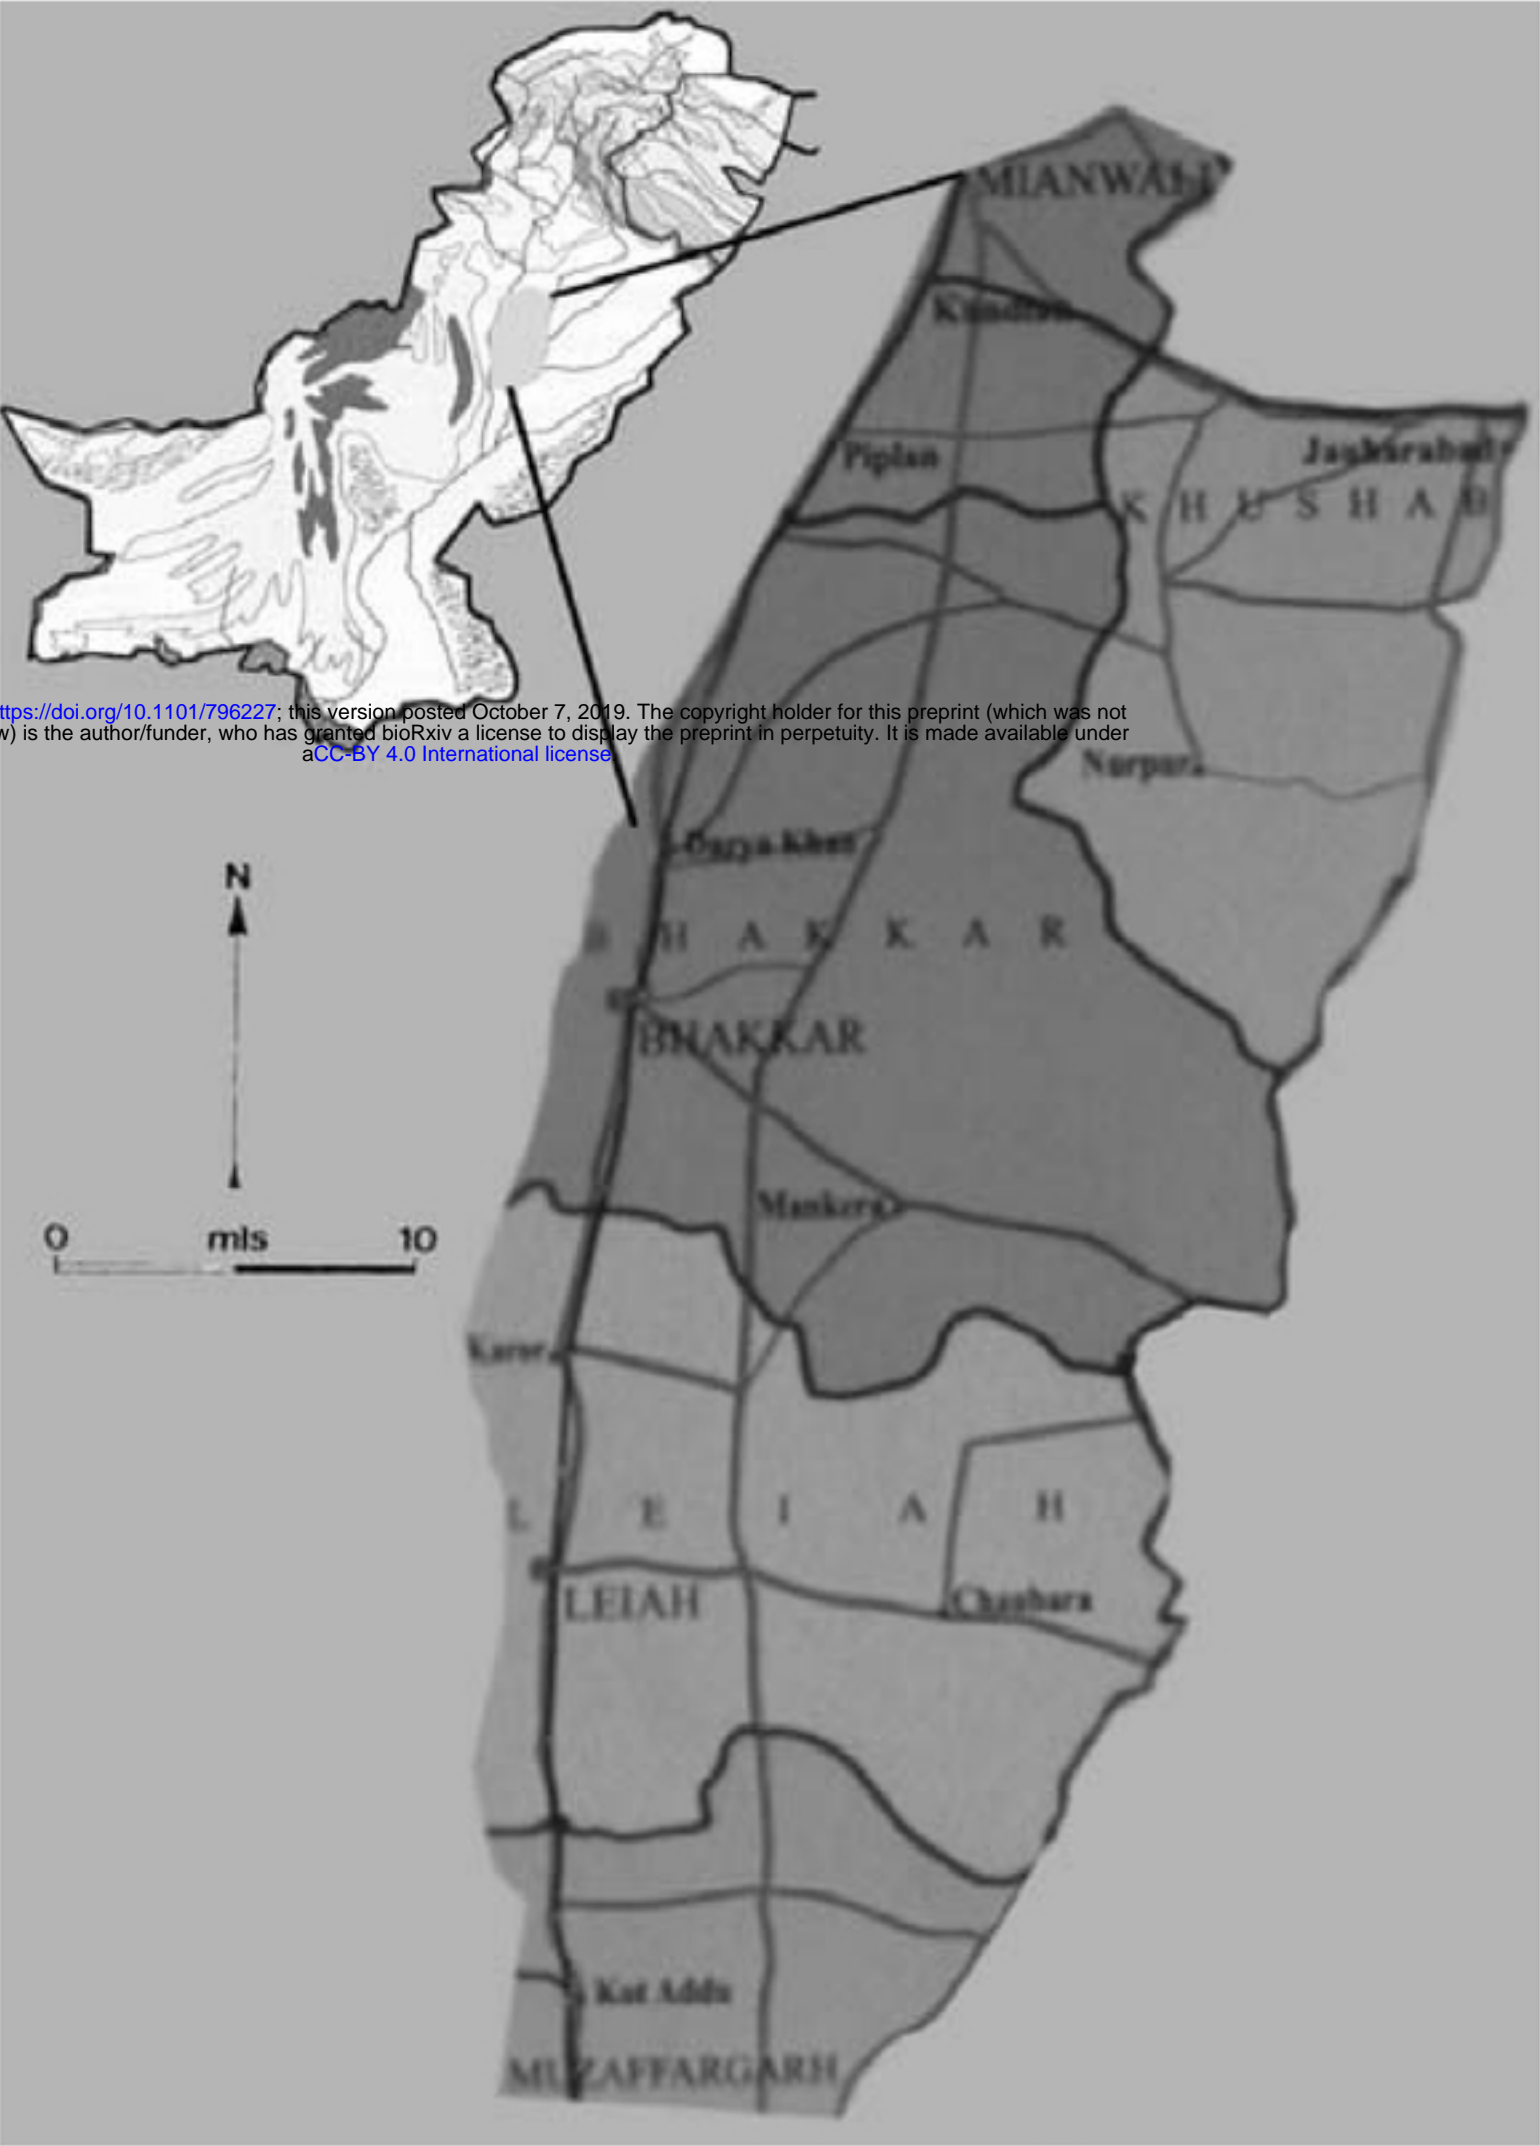

**Fig. 1: Demography of informants of this study area**

bioRxiv preprint doi: <https://doi.org/10.1101/796227>; this version posted October 7, 2019. The copyright holder for this preprint (which was not certified by peer review) is the author/funder, who has granted bioRxiv a license to display the preprint in perpetuity. It is made available under aCC-BY 4.0 International license.

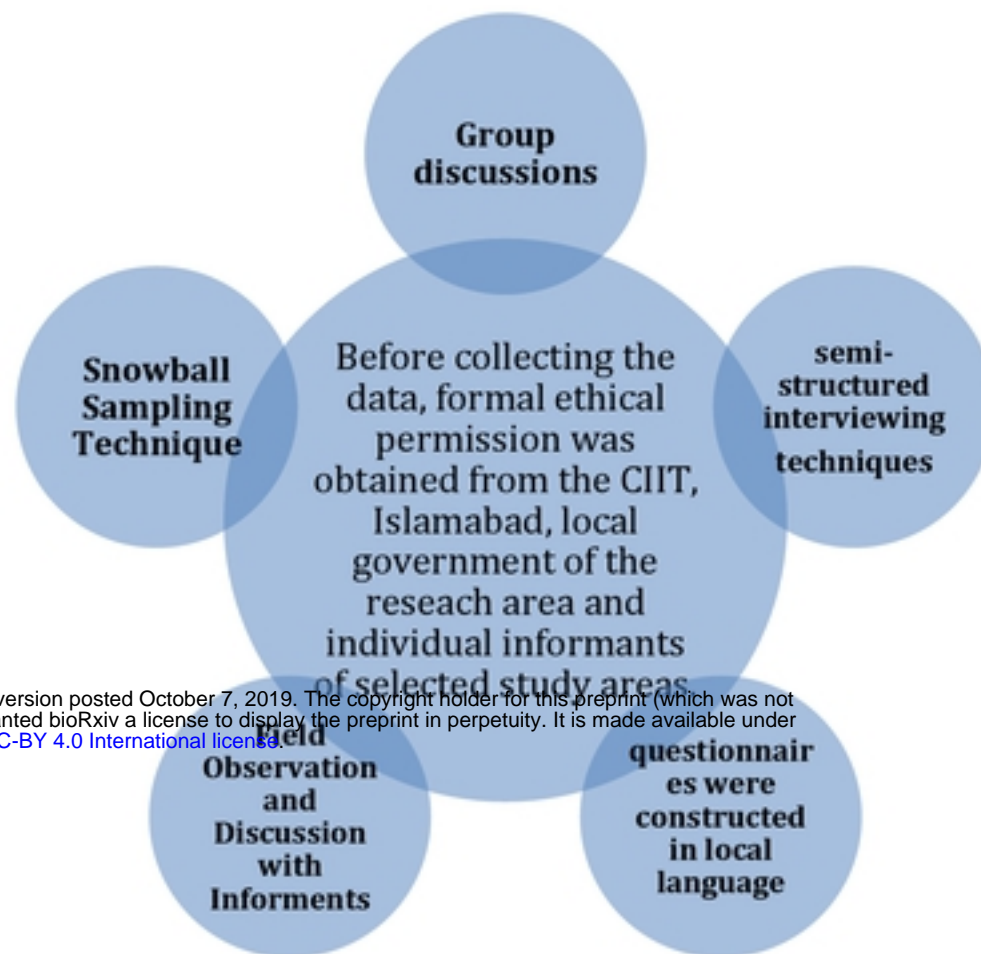

**Fig. 2: Ethnobotanical survey and data collection**

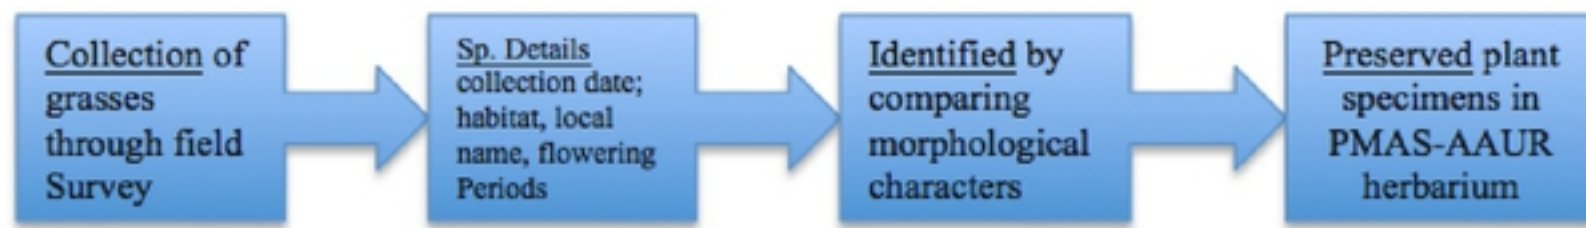

**Fig. 3: Different steps for collection and identification of Grasses**



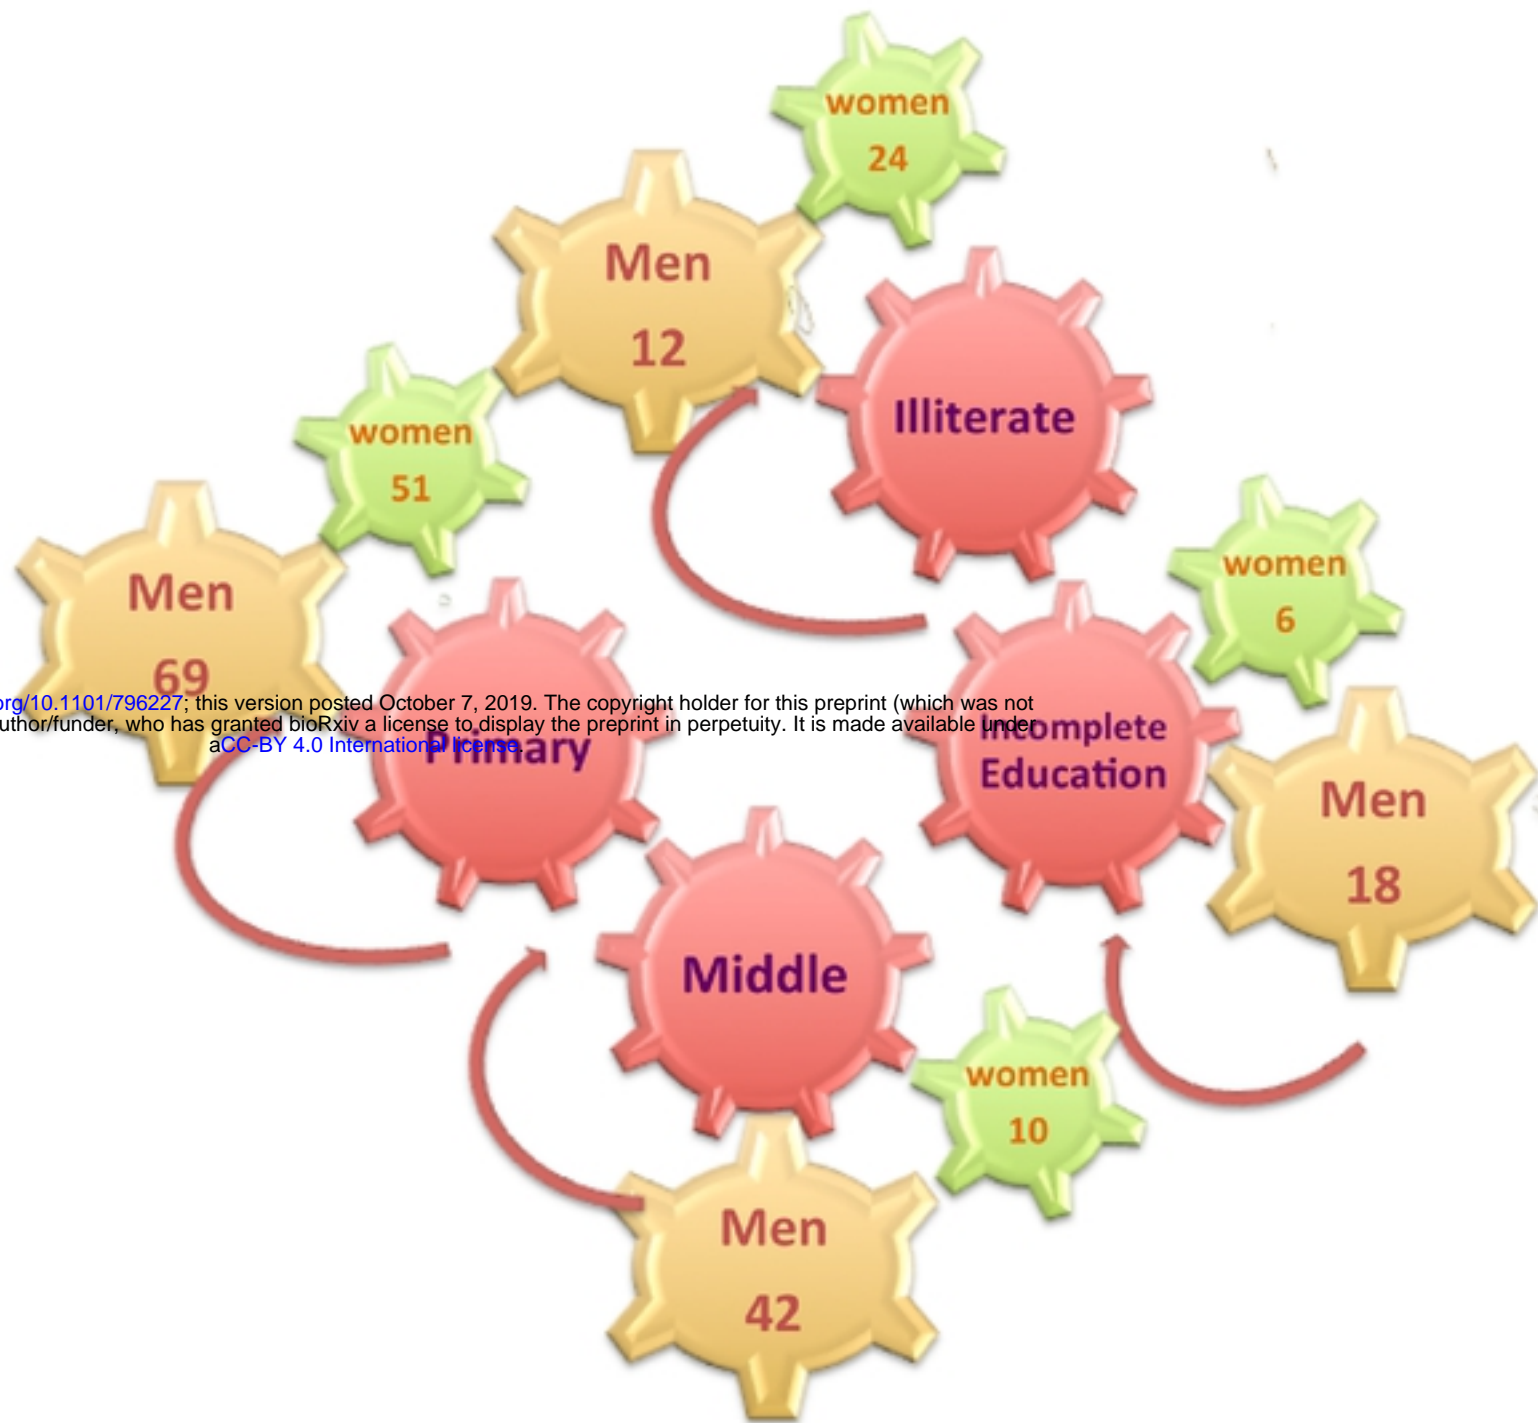

**Fig. 4: Summary of education levels of informants**

bioRxiv preprint doi: <https://doi.org/10.1101/796227>; this version posted October 7, 2019. The copyright holder for this preprint (which was not certified by peer review) is the author/funder, who has granted bioRxiv a license to display the preprint in perpetuity. It is made available under aCC-BY 4.0 International license.

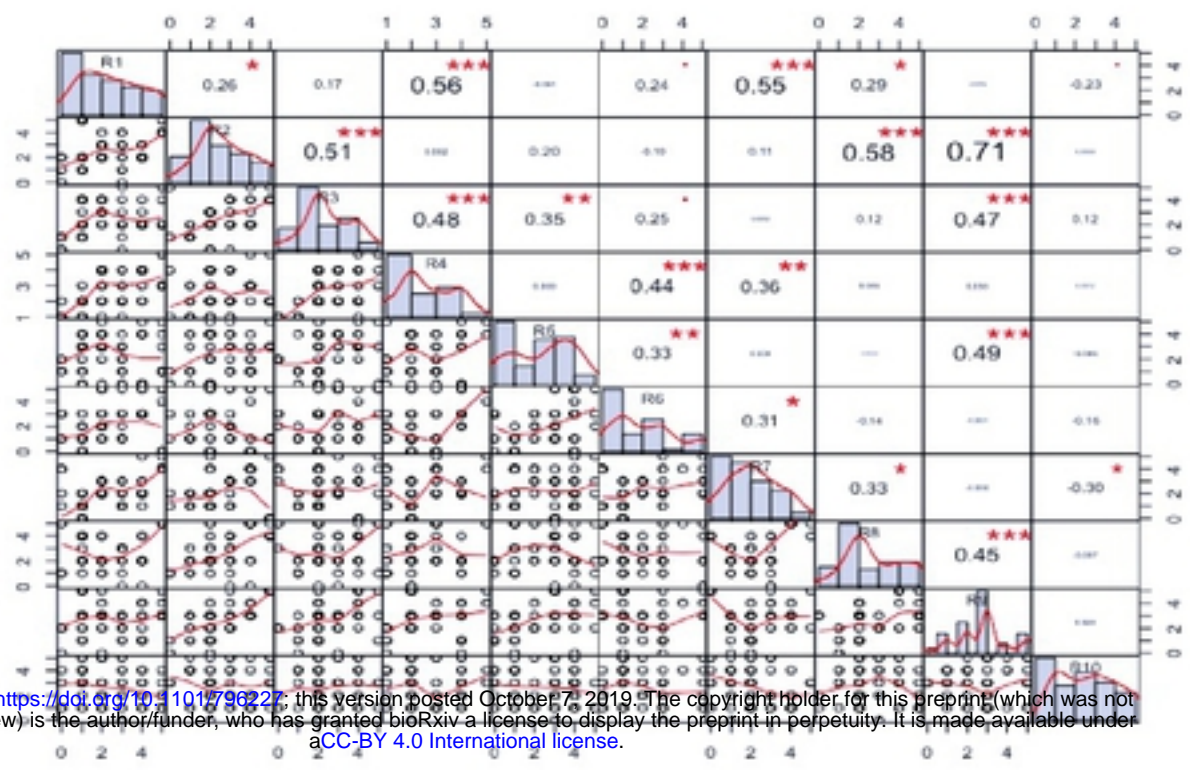

**Fig. 5: Co-relation used for pairwise comparison for different grasses**



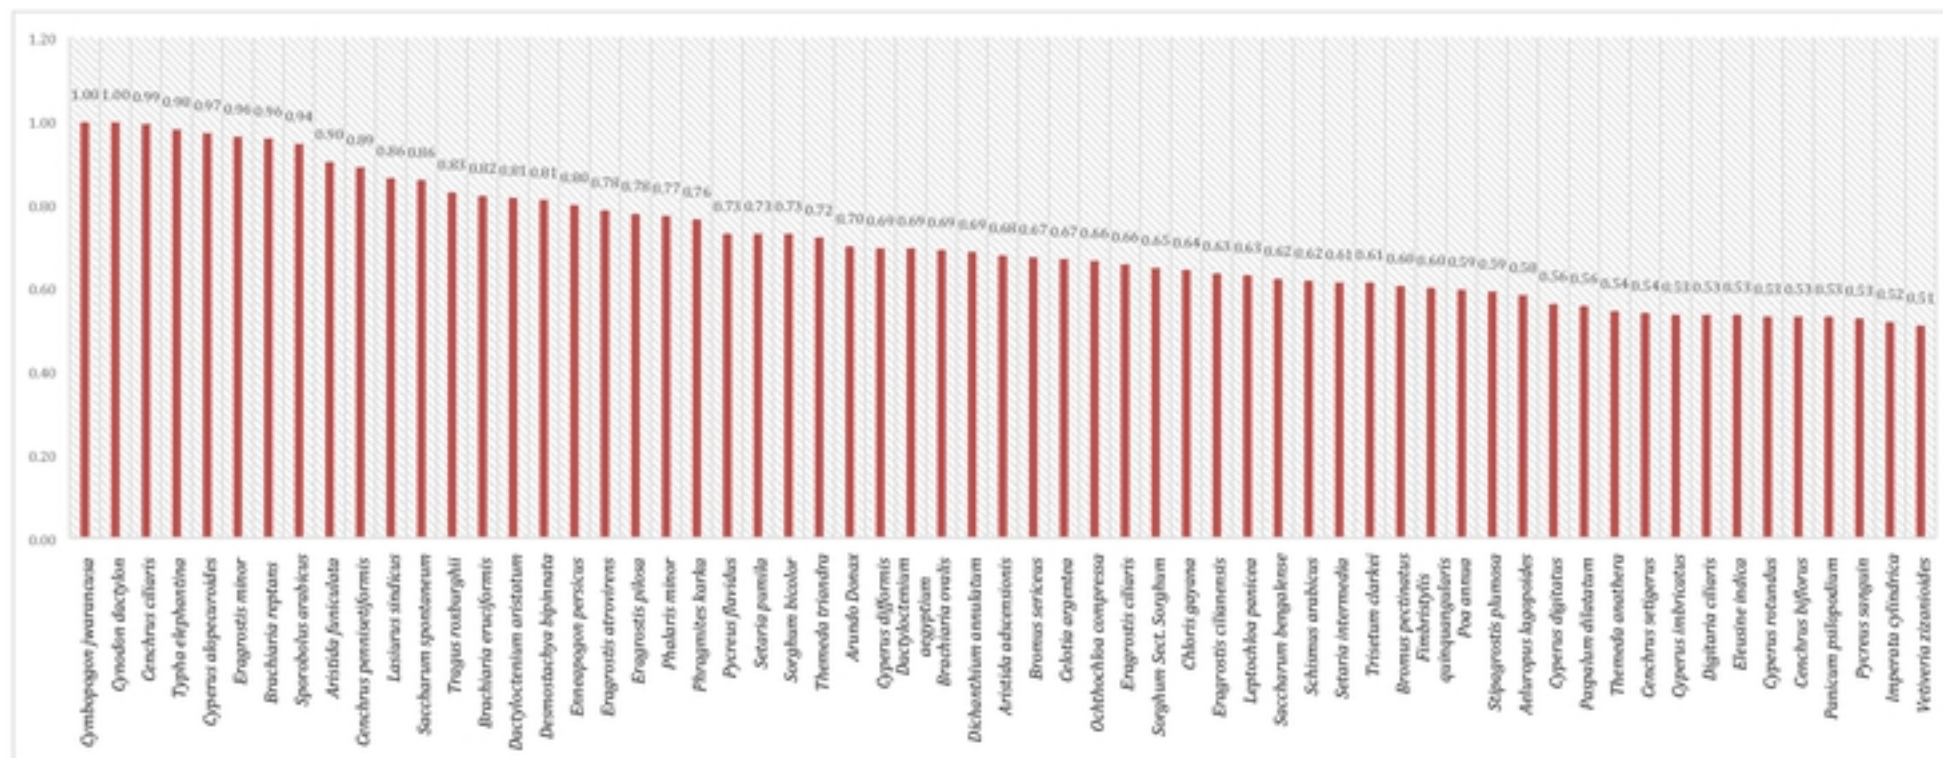

**Fig. 6 Prioritizing of fodder grasses on the bases of RFC**

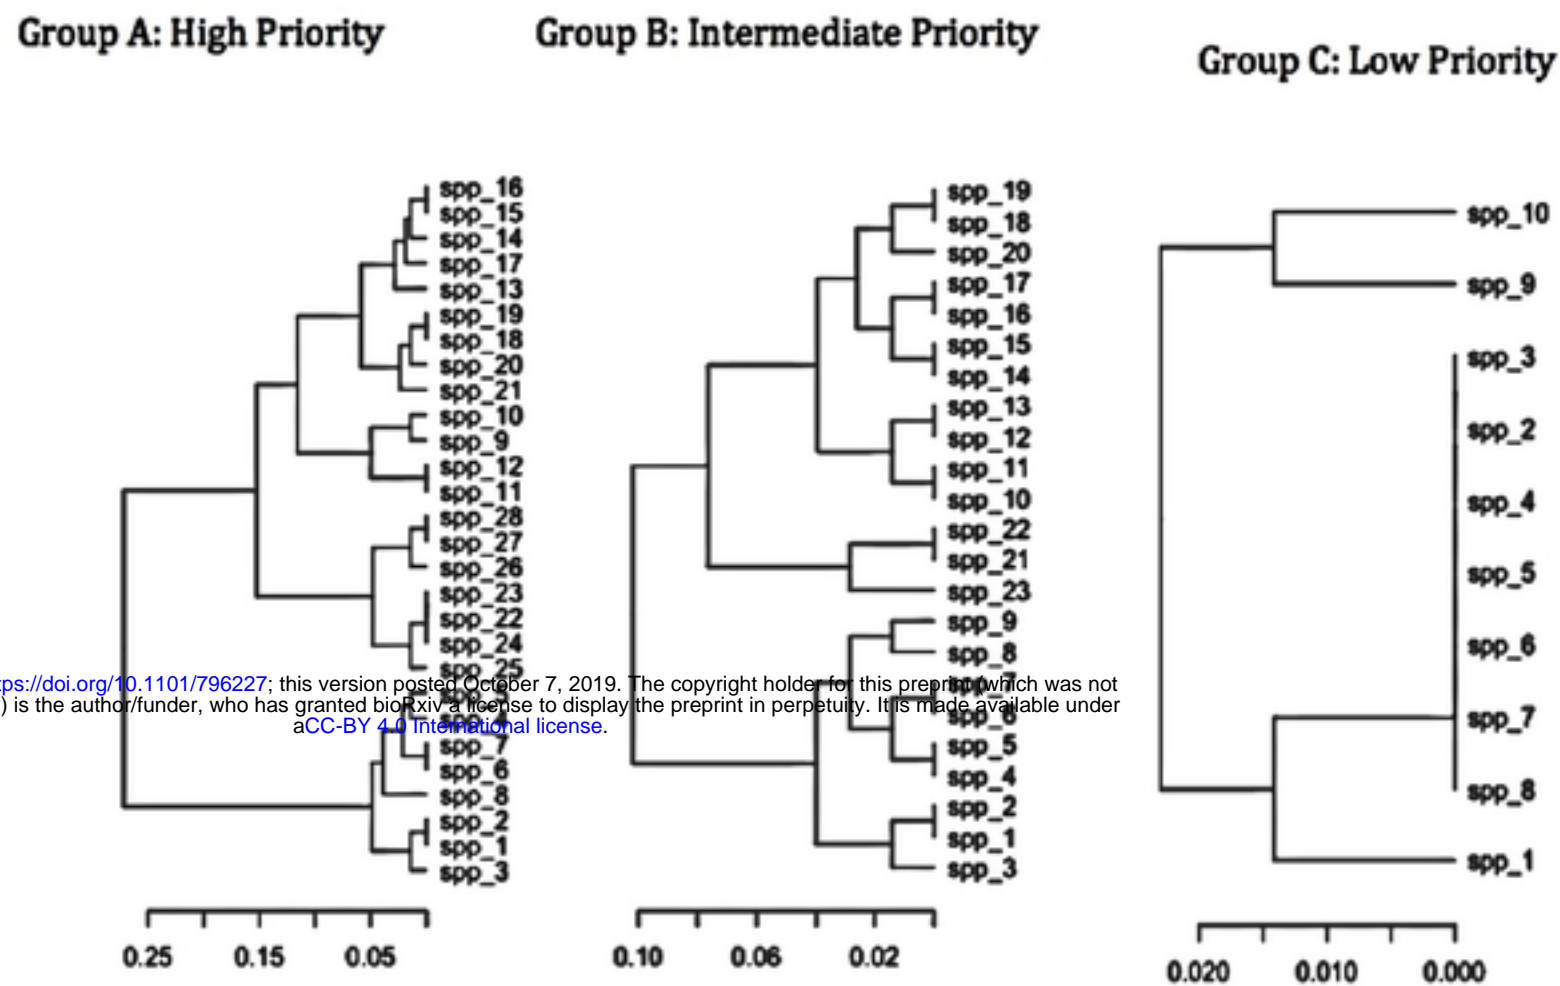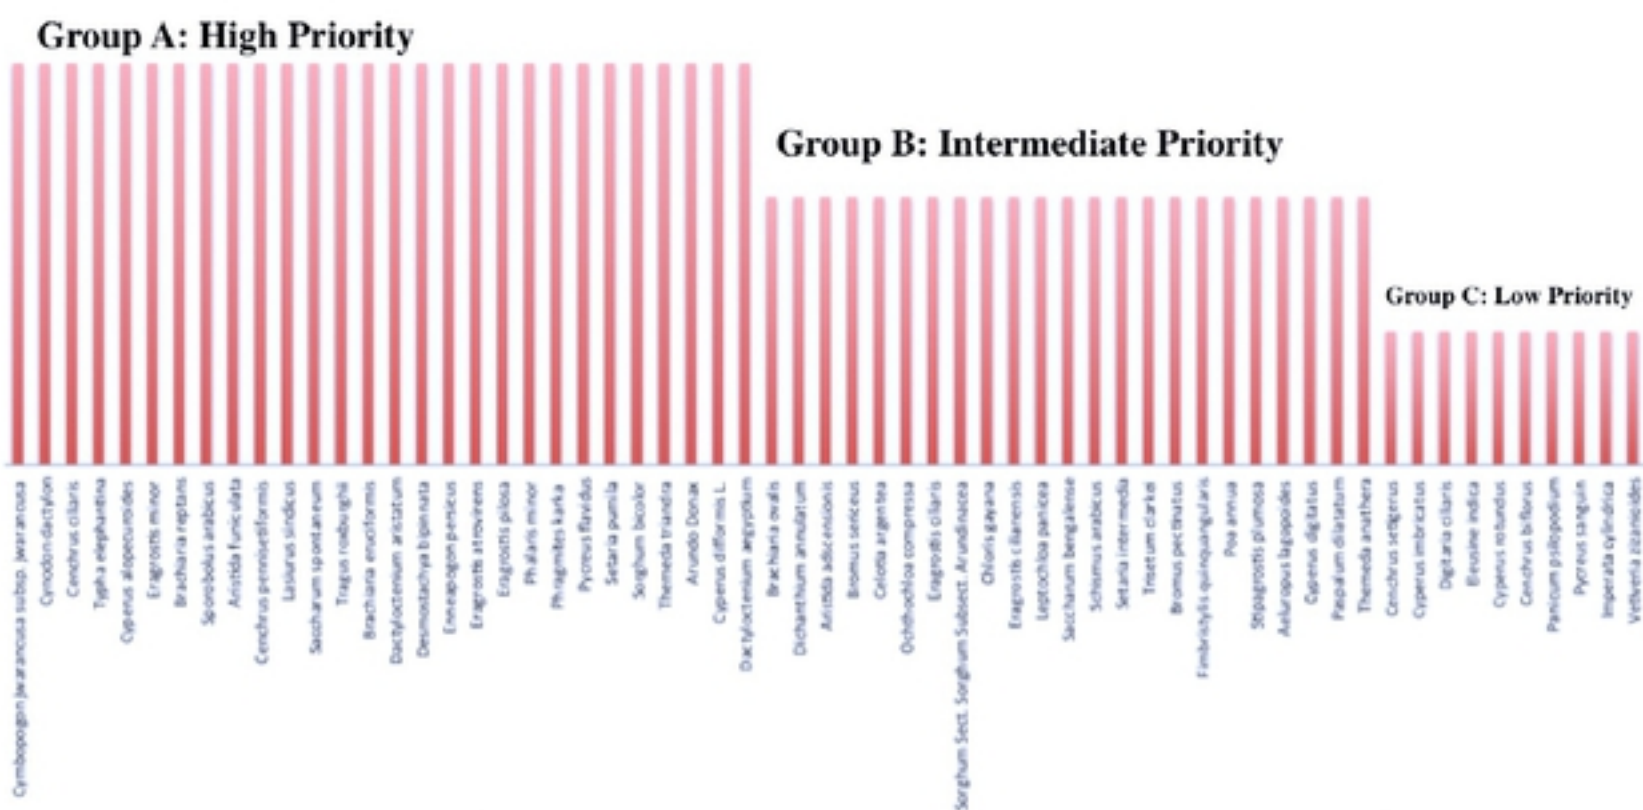

**Fig. 7: Cluster analysis for grouping of ethno botanically used fodder grasses**

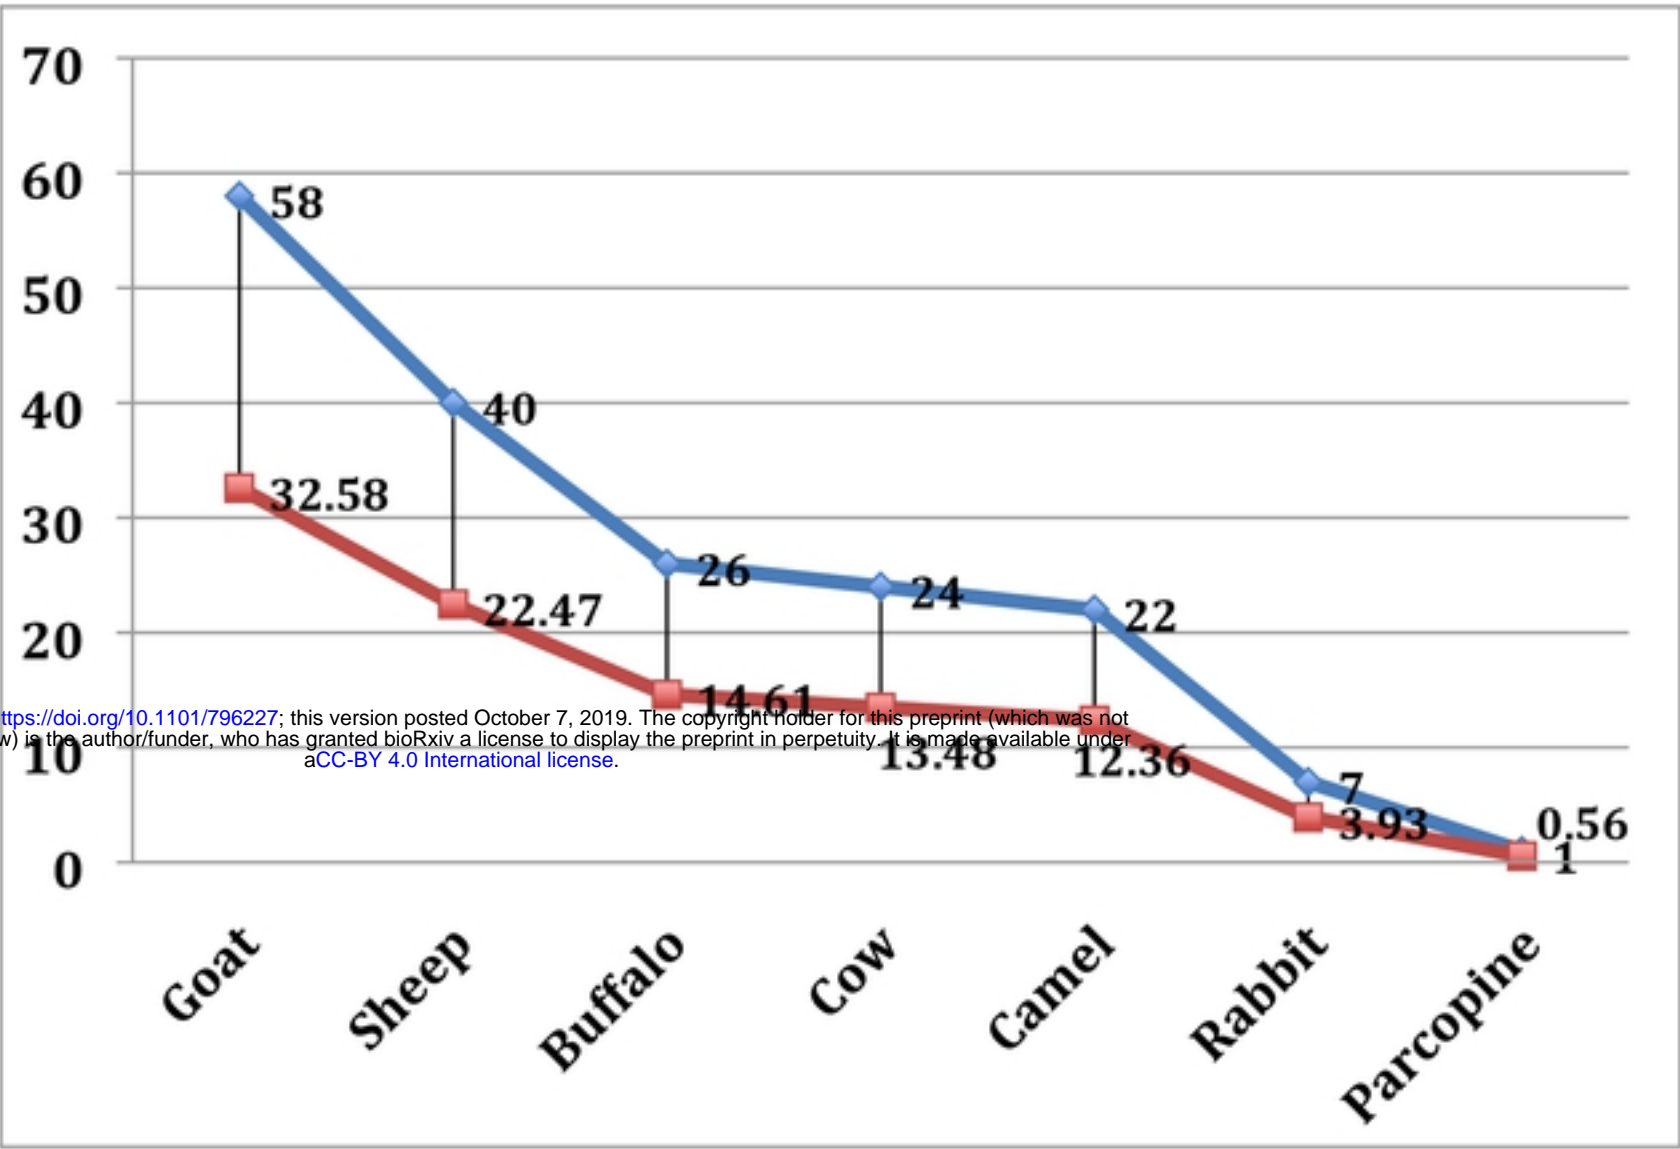

**Fig. 8: Animals Preferences of grasses in the study area**

bioRxiv preprint doi: <https://doi.org/10.1101/796227>; this version posted October 7, 2019. The copyright holder for this preprint (which was not certified by peer review) is the author/funder, who has granted bioRxiv a license to display the preprint in perpetuity. It is made available under aCC-BY 4.0 International license.

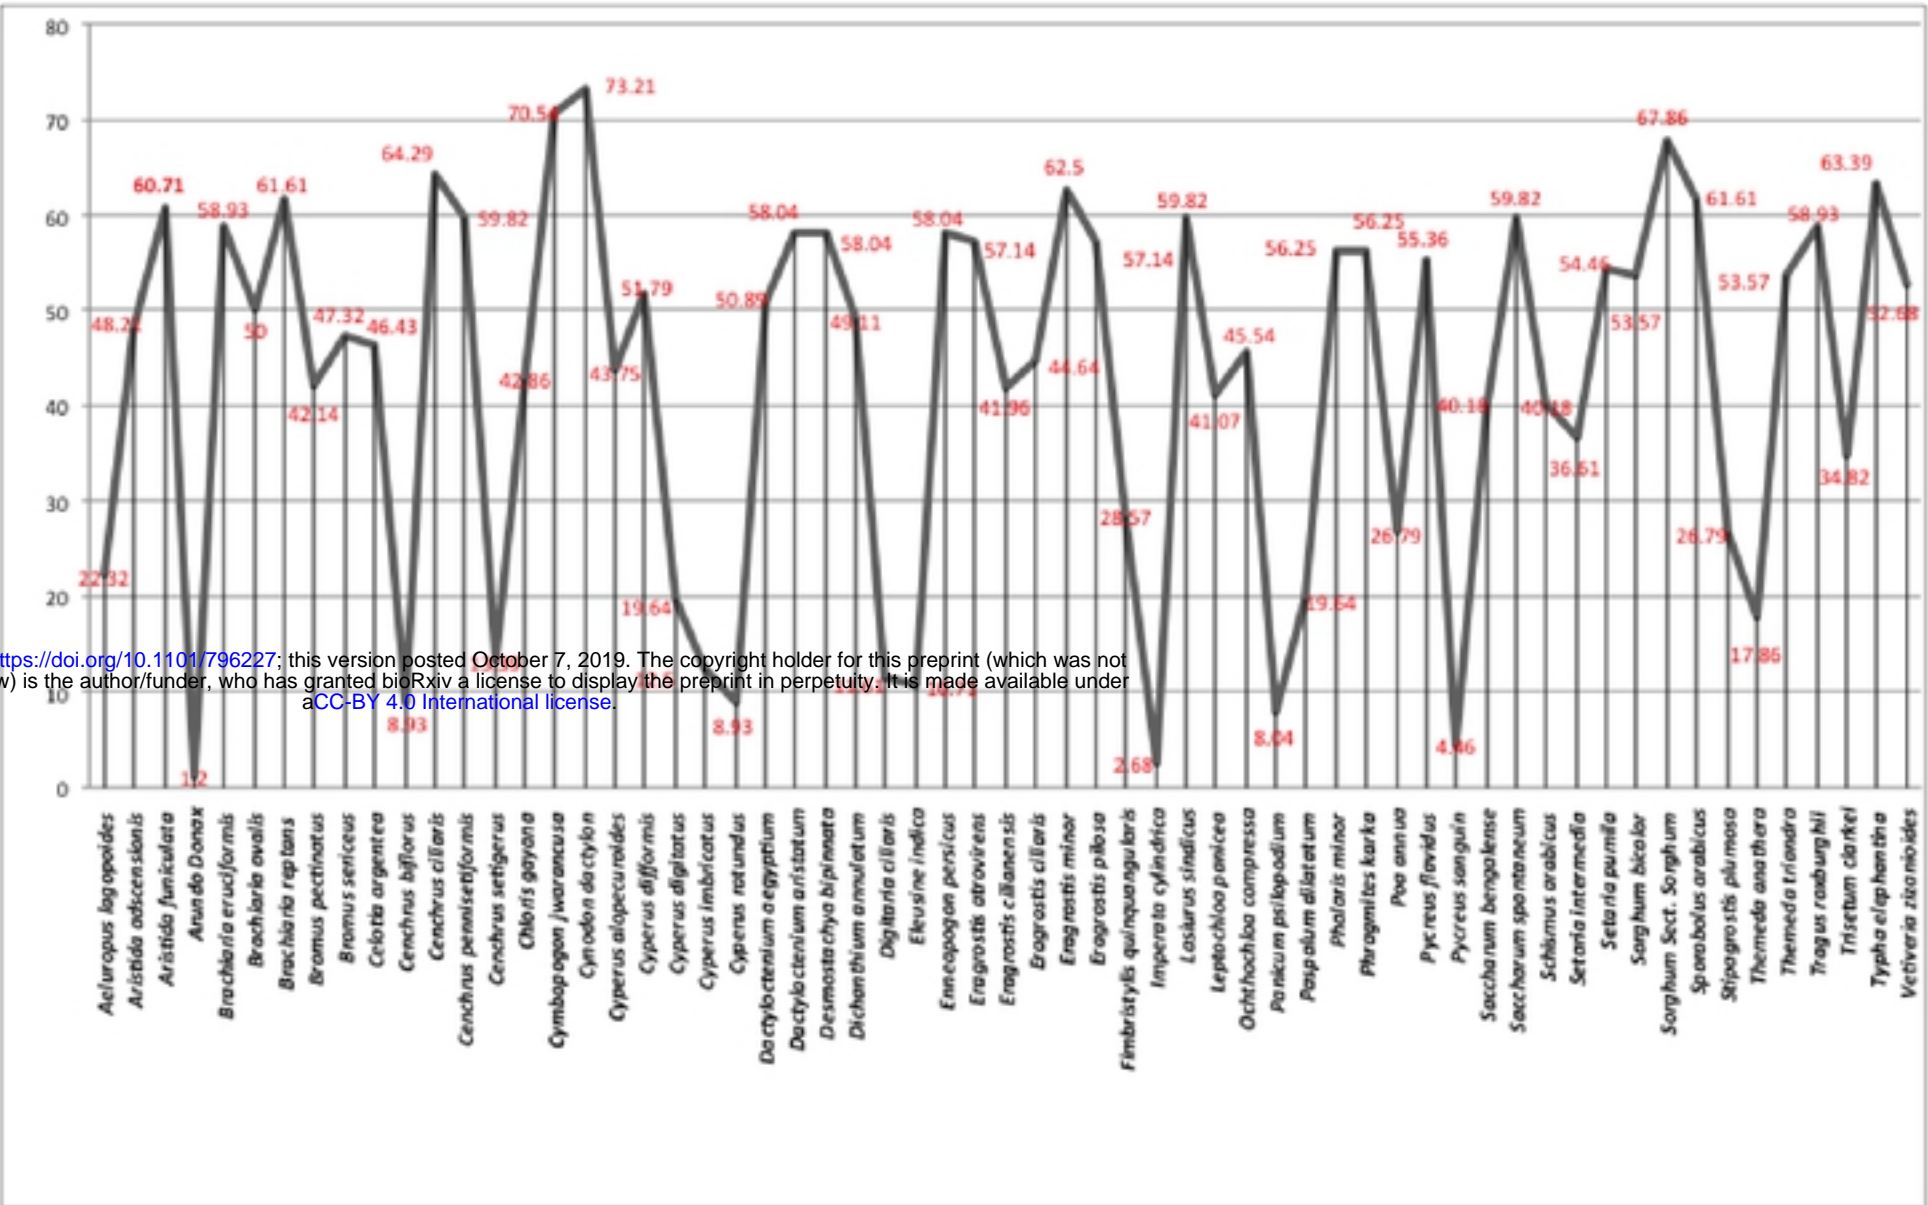

**Fig. 9: Frequency of milk producing species according to informants ranking**



bioRxiv preprint doi: <https://doi.org/10.1101/796227>; this version posted October 7, 2019. The copyright holder for this preprint (which was not certified by peer review) is the author/funder, who has granted bioRxiv a license to display the preprint in perpetuity. It is made available under aCC-BY 4.0 International license.

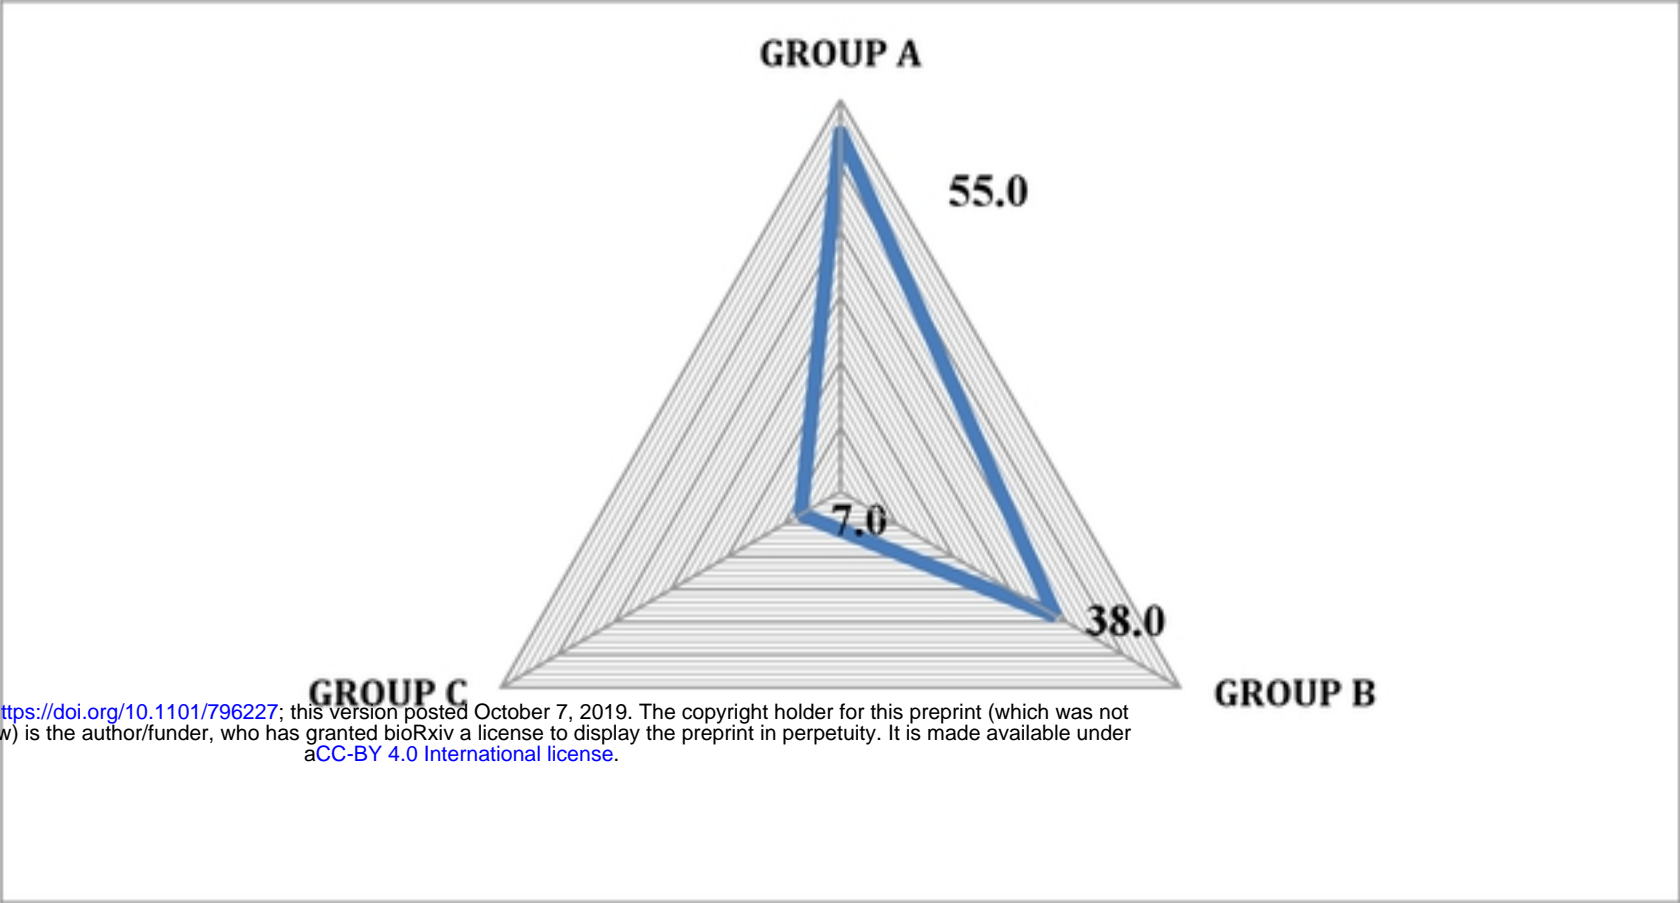

**Fig. 10: Percentage of species in each group**

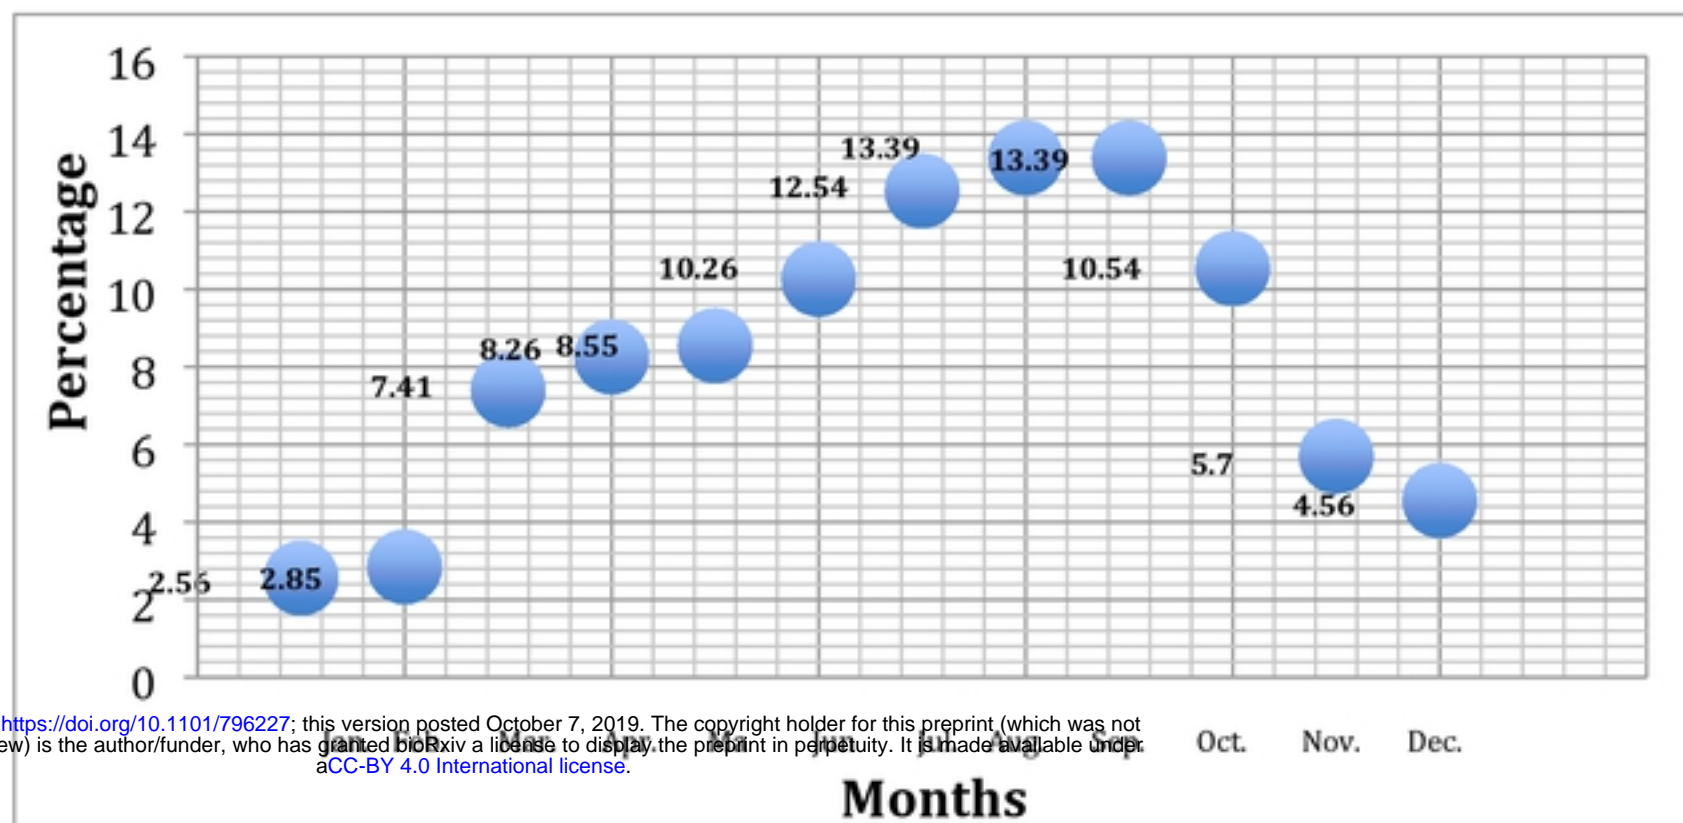

**Fig. 11: Availability of the grasses in the study area**

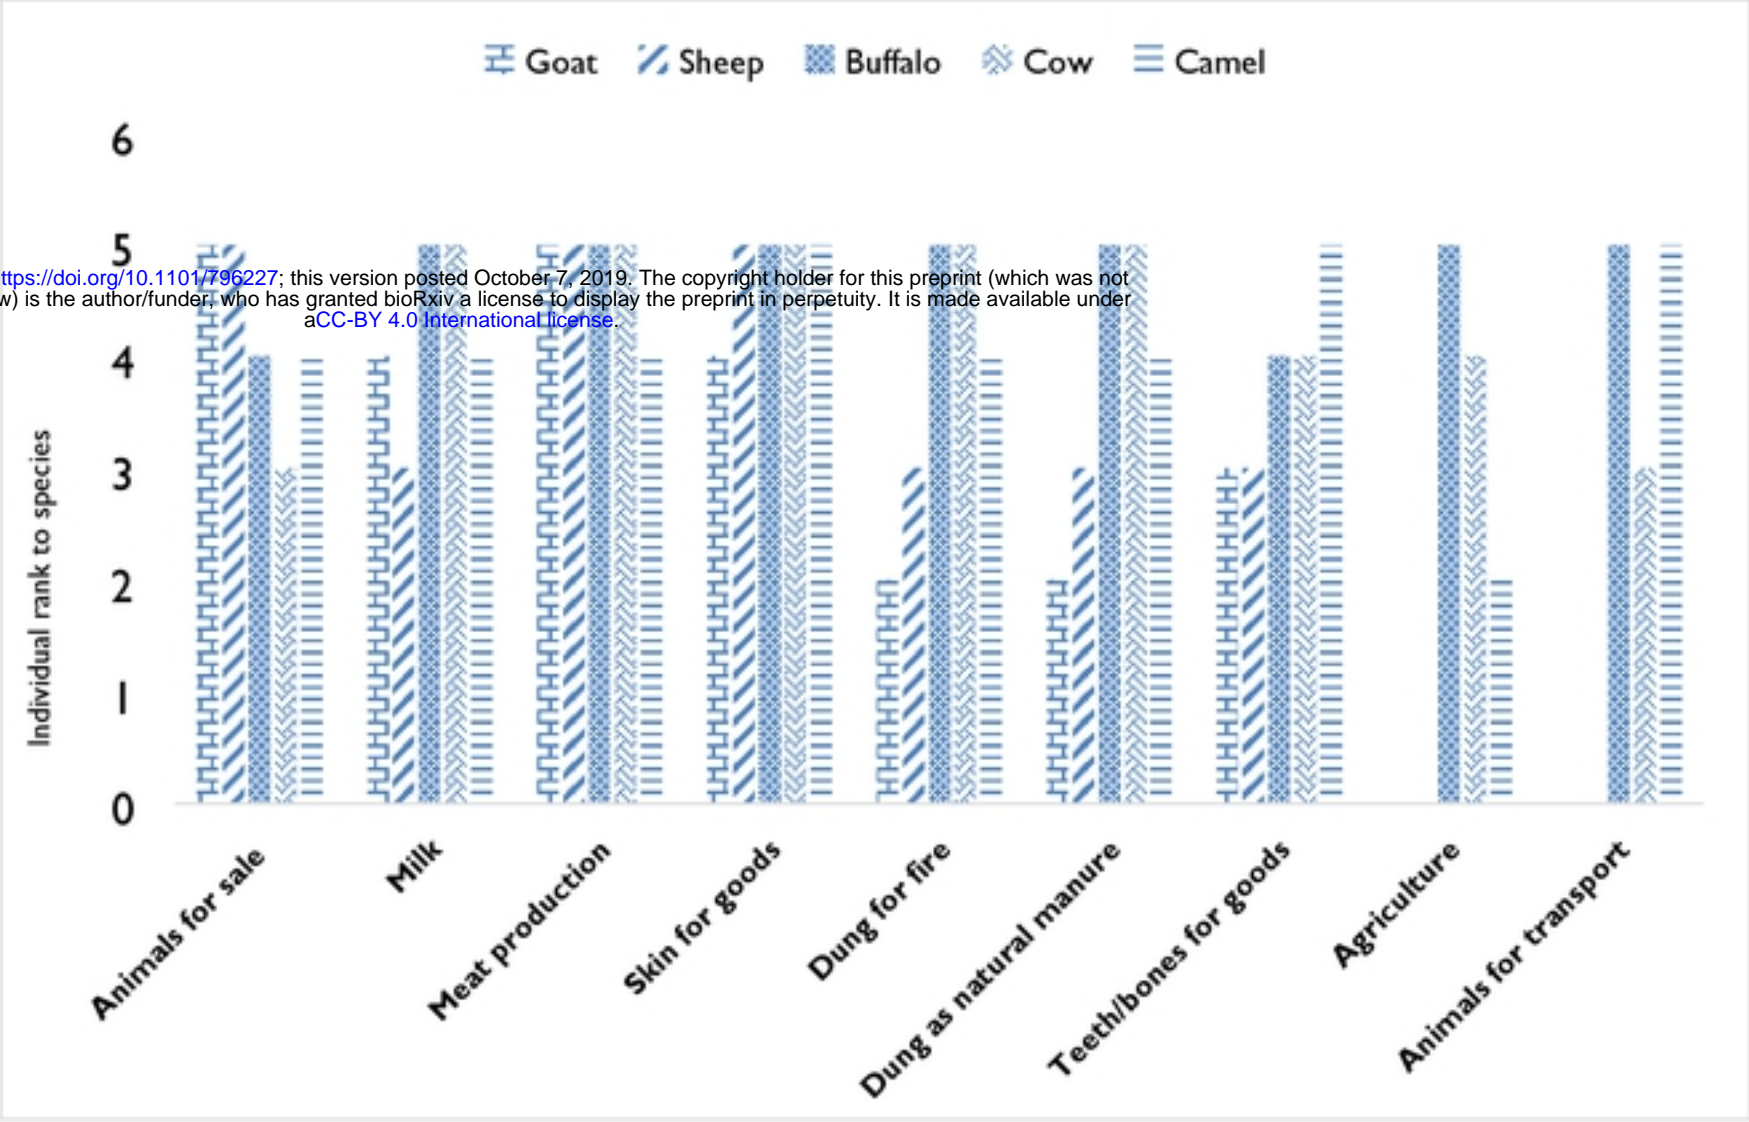

**Fig. 12: People use Livestock for improving their economic life in Thal Desert**



**Table 1. Relative abundance categories and Coverage in the study area**

| <b>Abundance scale</b> | <b>Abundance categories</b> | <b>Coverage of Grasses</b> |
|------------------------|-----------------------------|----------------------------|
|                        | Rare (R)                    | <7%                        |
| 1                      | Occasional (O)              | 7-10%                      |
| 2                      | Frequent (F)                | 10-25%                     |
| 3                      | Common (C)                  | 25-55%                     |
| 4                      | Abundant (A)                | 55-100%                    |

**Table 2: Demography of informants of the study area**

| Type of Informants                | Young<br>aged<br>20-35 | Middle<br>aged<br>36-50 | Seniors<br>aged<br>51-67 | Total |
|-----------------------------------|------------------------|-------------------------|--------------------------|-------|
|                                   |                        |                         |                          |       |
| Local Shepherds (F)               | 8                      | 19                      | 9                        | 36    |
| Local Shepherds (M)               | 11                     | 20                      | 13                       | 44    |
| Farmed Ruminant care takers (F)   | 5                      | 17                      | 5                        | 27    |
| Farmed Ruminant care takers (M)   | 11                     | 16                      | 6                        | 33    |
| Domestic Ruminant care takers (F) | 7                      | 12                      | 9                        | 28    |
| Domestic Ruminant care takers (M) | 6                      | 32                      | 26                       | 64    |
| Total informants                  | 48                     | 116                     | 68                       | 232   |

bioRxiv preprint doi: <https://doi.org/10.1101/796227>; this version posted October 7, 2019. The copyright holder for this preprint (which was not certified by peer review) is the author/funder, who has granted bioRxiv a license to display the preprint in perpetuity. It is made available under aCC-BY 4.0 International license.

**Key:** Local Shepherds (who take care cattle in the field for free grazing), Farmed Ruminant caretakers (who take care cattle in the livestock forms), Domestic Ruminant caretakers (who take care cattle in their home).

**Table. 3: Pair wise ranking of wild palatable plants from all districts of Thal**

| S. No. | Botanical name                                                 | R1 | R2 | R3 | R4 | R5 | R6 | R7 | R8 | R9 | R10 | T  | R                |
|--------|----------------------------------------------------------------|----|----|----|----|----|----|----|----|----|-----|----|------------------|
| 1      | <i>Cymbopogon jwarancusa subsp. jwarancusa</i> (Jones) Schult. | 5  | 5  | 5  | 5  | 5  | 5  | 5  | 5  | 5  | 3   | 48 | 1 <sup>ST</sup>  |
| 2      | <i>Cynodon dactylon</i> (L.) Pers.                             | 5  | 4  | 4  | 5  | 4  | 4  | 4  | 5  | 4  | 4   | 43 | 2 <sup>ND</sup>  |
| 3      | <i>Cenchrus ciliaris</i> L.                                    | 4  | 3  | 4  | 4  | 4  | 5  | 3  | 4  | 4  | 4   | 39 | 3 <sup>RD</sup>  |
| 4      | <i>Typha elephantina</i> Roxb.                                 | 5  | 4  | 5  | 3  | 3  | 5  | 4  | 5  | 3  | 1   | 38 | 4 <sup>TH</sup>  |
| 5      | <i>Cyperus alopecuroides</i> Rottb.                            | 4  | 2  | 3  | 3  | 4  | 3  | 5  | 4  | 2  | 3   | 33 | 5 <sup>TH</sup>  |
| 6      | <i>Eragrostis minor</i> Host                                   | 2  | 2  | 3  | 4  | 4  | 5  | 2  | 2  | 3  | 5   | 32 | 6 <sup>TH</sup>  |
| 7      | <i>Sporobolus arabicus</i> Boiss.                              | 2  | 3  | 4  | 4  | 3  | 2  | 3  | 2  | 3  | 5   | 31 | 7 <sup>TH</sup>  |
| 8      | <i>Brachiaria reptans</i> (L.) C. A. Gardner & C.E.            | 1  | 5  | 4  | 2  | 3  | 1  | 0  | 4  | 5  | 5   | 30 | 8 <sup>TH</sup>  |
| 9      | <i>Tragus rostratus</i> Panigrahi                              | 1  | 3  | 4  | 2  | 3  | 1  | 0  | 4  | 5  | 5   | 30 | 9 <sup>TH</sup>  |
| 10     | <i>Lasiurus indicus</i> Henr.                                  | 4  | 2  | 2  | 4  | 5  | 3  | 2  | 2  | 4  | 1   | 29 | 10 <sup>TH</sup> |
| 11     | <i>Aristida funiculata</i> Trin. & Pupr.                       | 5  | 4  | 2  | 3  | 1  | 0  | 4  | 5  | 3  | 2   | 29 | 10 <sup>TH</sup> |
| 12     | <i>Cenchrus pennisetiformis</i> Hochst. & Steud.               | 1  | 5  | 4  | 2  | 3  | 1  | 0  | 4  | 5  | 4   | 29 | 10 <sup>TH</sup> |
| 13     | <i>Saccharum spontaneum</i> L.                                 | 2  | 2  | 3  | 4  | 4  | 5  | 2  | 2  | 3  | 2   | 29 | 10 <sup>TH</sup> |
| 14     | <i>Themeda triandra</i> Forsk.                                 | 5  | 4  | 2  | 3  | 1  | 0  | 4  | 5  | 3  | 2   | 29 | 10 <sup>TH</sup> |
| 15     | <i>Pycreus flavidus</i> (Retz.) T. Koyama                      | 2  | 3  | 3  | 2  | 4  | 1  | 3  | 2  | 3  | 5   | 28 | 11 <sup>TH</sup> |

bioRxiv preprint doi: <https://doi.org/10.1101/796227>; this version posted October 7, 2019. The copyright holder for this preprint (which was not certified by peer review) is the author/funder, who has granted bioRxiv a license to display the preprint in perpetuity. It is made available under aCC-BY 4.0 International license.

**Table 4: List of the collected grasses, Ethnobotanical, Ethno veterinary data, abundance; focal persons count (FC) and relative frequency citation (RFC) of fodder grasses of area of Thal desert, Punjab Pakistan**

| S. No. | Family     | Voucher No         | Botanical name                      | Local name | Palatable                                                                            | Fodder part                                                                           | Feeding method | Ethno veterinary | Other uses | Soil ecology | RA | FC(n) | RFC    |
|--------|------------|--------------------|-------------------------------------|------------|--------------------------------------------------------------------------------------|---------------------------------------------------------------------------------------|----------------|------------------|------------|--------------|----|-------|--------|
| 1      | Cyperaceae | PMAS-AAUR-2013-320 | <i>Cyperus alopecuroides</i> Rottb. |            |    |    | Fo             | *                | *          | *            | F  | 225   | 0.9698 |
| 2      | Cyperaceae | PMAS-AAUR-2013-321 | <i>Cyperus difformis</i> L.         | Bhudde     |   |  | Fo             | *                | *          | *            | C  | 161   | 0.6940 |
| 3      | Cyperaceae | PMAS-AAUR-2013-322 | <i>Cyperus digitatus</i> Rox b.     | Sowe       |  |  | Fo, For        | *                | Fuel       | Soil binder  | C  | 130   | 0.5603 |
| 4      | Cyperaceae | PMAS-AAUR-2013-323 | <i>Cyperus imbricatus</i> Re tz.    |            |  |  | Fo, For        | *                | *          | Soil binder  | F  | 124   | 0.5345 |
| 5      | Cyperaceae | PMAS-AAUR-2013-324 | <i>Cyperus rotundus</i> L.          | Dela       |  |  | Fo             | ***              | ***        | Soil binder  | A  | 123   | 0.5302 |

bioRxiv preprint doi: <https://doi.org/10.1101/796227>; this version posted October 7, 2019. The copyright holder for this preprint (which was not certified by peer review) is the author/funder, who has granted bioRxiv a license to display the preprint in perpetuity. It is made available under aCC-BY 4.0 International license.

| S. No. | Family     | Voucher No         | Botanical name                                  | Local name   | Palatable                                                                                                                                                                                                                                                                                                                                                                                                                                         | Fodder part                                                                           | Feeding method | Ethno veterinary | Other uses | Soil ecology | RA | FC(n) | RFC    |
|--------|------------|--------------------|-------------------------------------------------|--------------|---------------------------------------------------------------------------------------------------------------------------------------------------------------------------------------------------------------------------------------------------------------------------------------------------------------------------------------------------------------------------------------------------------------------------------------------------|---------------------------------------------------------------------------------------|----------------|------------------|------------|--------------|----|-------|--------|
|        |            |                    |                                                 |              |                                                                                                                                                                                                                                                                                                                                                                 |                                                                                       |                |                  |            |              |    |       |        |
| 6      | Cyperaceae | PMAS-AAUR-2013-325 | <i>Fimbristylis quinquangulata</i> (Vahl) Kunth | Murrakh      | <br><br><br><br>        |    | Fo, For        | *                | *          | Soil binder  | O  | 139   | 0.5991 |
| 7      | Cyperaceae | PMAS-AAUR-2013-325 | <i>Pycreus flavidus</i> (Retz.) T. Koyama       | Sayyar Ghaah | <br><br><br><br> |  | Fo, For        | *                | ***        | Soil binder  | O  | 169   | 0.7284 |
| 8      | Cyperaceae | PMAS-AAUR-2013-327 | <i>Pycreus sanguin</i> (Vahl) Nees              | Ghaa         | <br>                                                                                                                                                                                                                                                                      |  | Fo             | *                | ***        | *            | F  | 122   | 0.5259 |
| 9      | Poaceae    | PMAS-AAUR-2013-328 | <i>Aeluropus lagopoides</i> (L.) Thwaites       | Kalar Ghaah  | <br><br>                                                                                                                                                                              |  | Fo             | *                | ***        | *            | A  | 135   | 0.5819 |
| 10     | Poaceae    | PMAS-AAUR-2013-329 | <i>Aristida adscensionis</i> L                  | Lamb Ghaas   | <br>                                                                                                                                                                                                                                                                      |  | Fo, For        | ***              | *          | *            | A  | 157   | 0.6767 |
| 11     | Poaceae    | PMAS-AAUR-2013-330 | <i>Aristida funiculata</i> Trin. & Pupr.        | Lamb Ghaas   | <br><br>                                                                                                                                                                              |  | Fo, For        | *                | *          | *            | A  | 209   | 0.9009 |
| 12     | Poaceae    | PMAS-AAUR-2013-331 | <i>Arundo Donax</i> L.                          | Narr         | <br><br><br>                                                                                      |  | Fo, For, Mf    | ***              | ***        | *            | A  | 162   | 0.6983 |

bioRxiv preprint doi: <https://doi.org/10.1101/796227>; this version posted October 7, 2019. The copyright holder for this preprint (which was not certified by peer review) is the author/funder, who has granted bioRxiv a license to display the preprint in perpetuity. It is made available under aCC-BY 4.0 International license.



| S. No. | Family  | Voucher No         | Botanical name                                      | Local name           | Palatable                                                                                                                                                                                                                                                                                                                                                | Fodder part                                                                           | Feeding method | Ethno veterinary | Other uses | Soil ecology | RA | FC(n) | RFC    |
|--------|---------|--------------------|-----------------------------------------------------|----------------------|----------------------------------------------------------------------------------------------------------------------------------------------------------------------------------------------------------------------------------------------------------------------------------------------------------------------------------------------------------|---------------------------------------------------------------------------------------|----------------|------------------|------------|--------------|----|-------|--------|
| 13     | Poaceae | PMAS-AAUR-2013-333 | <i>Brachiaria eruciformis</i> (J.E. Smith) Griseb   |                      | <br><br><br>         |    | Fo, For        | *                | *          | *            | A  | 190   | 0.8190 |
| 14     | Poaceae | PMAS-AAUR-2013-333 | <i>Brachiaria eruciformis</i> (J.E. Smith) Griseb   |                      | <br><br><br>         |    |                | *                | *          | *            | A  | 160   | 0.6897 |
| 15     | Poaceae | PMAS-AAUR-2013-334 | <i>Brachiaria reptans</i> (L.) C. A. Gardner & C.E. | Ghaah                | <br><br><br>  |  | Fo, For        | *                | *          | *            | A  | 222   | 0.9569 |
| 16     | Poaceae | PMAS-AAUR-2013-335 | <i>Bromus pectinatus</i> Th unb.                    |                      | <br>                                                                                                                                                                               |  | Fo             | *                | *          | *            | A  | 140   | 0.6034 |
| 17     | Poaceae | PMAS-AAUR-2013-336 | <i>Bromus sericeus</i> Drobov                       |                      | <br>                                                                                                                                                                               |  | Fo             | *                | *          | *            | A  | 156   | 0.6724 |
| 18     | Poaceae | PMAS-AAUR-2013-337 | <i>Celotia argentea</i> L.                          | Ghaah                | <br>                                                                                                                                                                               |  | Fo             | *                | *          | *            |    | 155   | 0.6681 |
| 19     | Poaceae | PMAS-AAUR-2013-338 | <i>Cenchrus biflorus</i> Roxb.                      | Mohabbat buti/Ludri  | <br>                                                                                                                                                                               |  | Fo, Mf         | *                | *          | *            | A  | 123   | 0.5302 |
| 20     | Poaceae | PMAS-AAUR-2013-339 | <i>Cenchrus ciliaris</i> L.                         | Drahman/ Dhaman ghaa | <br><br><br> |  | Fo, For        | *                | *          | *            | A  | 230   | 0.9914 |
| 21     | Poaceae | PMAS-AAUR-2013-340 | <i>Cenchrus pennisetiformis</i> Hochst. & Steud.    | Dhamni               |                                                                                                                                                                                                                                                                       |  | Fo             | *                | *          | *            | A  | 206   | 0.8879 |

| S. No. | Family  | Voucher No         | Botanical name                                                        | Local name   | Palatable                                                                                                                                                                                                                                                                                                                                                                                                                                       | Fodder part                                                                                                                                                                   | Feeding method | Ethno veterinary | Other uses  | Soil ecology | RA | FC(n) | RFC    |
|--------|---------|--------------------|-----------------------------------------------------------------------|--------------|-------------------------------------------------------------------------------------------------------------------------------------------------------------------------------------------------------------------------------------------------------------------------------------------------------------------------------------------------------------------------------------------------------------------------------------------------|-------------------------------------------------------------------------------------------------------------------------------------------------------------------------------|----------------|------------------|-------------|--------------|----|-------|--------|
| 22     | Poaceae | PMAS-AAUR-2013-341 | <i>Cenchrus setigerus</i> Vahl                                        | Talra        | <br>                                                                                                                                                                                                                                                                          |                                                                                            | Fo             | *<br>*<br>*      | *<br>*<br>* | Soil binder  | C  | 125   | 0.5388 |
| 23     | Poaceae | PMAS-AAUR-2013-342 | <i>Chloris gayana</i> Kunth                                           | Chitta ghaa  | <br>                                                                                                                                                                                                                                                                          |                                                                                            | Fo             | *                | *           | *            | A  | 149   | 0.6422 |
| 24     | Poaceae | PMAS-AAUR-2013-343 | <i>Cymbopogon jwarancusa</i> subsp. <i>jwarancusa</i> (Jones) Schult. | Khavi        | <br><br><br><br>        | <br> | Fo, For, Mf    | *<br>*<br>*      | *<br>*<br>* | Soil binder  | C  | 231   | 0.9957 |
| 25     | Poaceae | PMAS-AAUR-2013-344 | <i>Cynodon dactylon</i> (L.) Pers.                                    | Talla        | <br><br><br><br> |                                                                                          | Fo, For        | *<br>*<br>*      | *<br>*<br>* | Soil binder  | C  | 231   | 0.9957 |
| 26     | Poaceae | PMAS-AAUR-2013-345 | <i>Dactyloctenium aegyptium</i> (L.) Willd.                           | Madhana ghaa | <br>                                                                                                                                                                                                                                                                      |                                                                                          | Fo             | *<br>*<br>*      | *           | Soil binder  | C  | 161   | 0.6940 |
| 27     | Poaceae | PMAS-AAUR-2013-346 | <i>Dactyloctenium aristatum</i>                                       | Madhana      | <br><br>                                                                                                                                                                               |                                                                                          | Fo, For        | *                | *           | Soil binder  | A  | 189   | 0.8147 |
| 28     | Poaceae | PMAS-AAUR-2013-347 | <i>Desmostachya bipinnata</i> (L.) Stapf.                             | Dab Ghaa     | <br><br><br><br> |                                                                                          | Fo, Mf         | *<br>*<br>*      | *<br>*<br>* | Soil binder  | A  | 188   | 0.8103 |
| 29     | Poaceae | PMAS-AAUR-2013-348 | <i>Dichanthium annulatum</i> (Forssk.) Stapf                          | Murgha ghaa  | <br>                                                                                                                                                                                                                                                                      |                                                                                          | Fo             | *<br>*<br>*      | *<br>*<br>* | Soil binder  | A  | 159   | 0.6853 |



| S. No. | Family  | Voucher No         | Botanical name                                            | Local name  | Palatable                                                                                                                                                                                                                                                                                                                                                                                                                                         | Fodder part                                                                           | Feeding method | Ethno veterinary | Other uses | Soil ecology | RA | FC(n) | RFC    |
|--------|---------|--------------------|-----------------------------------------------------------|-------------|---------------------------------------------------------------------------------------------------------------------------------------------------------------------------------------------------------------------------------------------------------------------------------------------------------------------------------------------------------------------------------------------------------------------------------------------------|---------------------------------------------------------------------------------------|----------------|------------------|------------|--------------|----|-------|--------|
| 30     | Poaceae | PMAS-AAUR-2013-349 | <i>Digitaria ciliaris</i> (Retz.) Koel                    |             | <br>                                                                                                                                                                                                                                                                            |    | Fo, For        | *                | **         | Soil binder  | F  | 124   | 0.5345 |
| 31     | Poaceae | PMAS-AAUR-2013-350 | <i>Eleusine indica</i> (L.) Gaertn.                       | Gandel ghaa |                                                                                                                                                                                                                                                                                                                                                                  |    | Fo             | **               | *          | Soil binder  | C  | 124   | 0.5345 |
| 32     | Poaceae | PMAS-AAUR-2013-351 | <i>Enneapogon persicus</i> Boiss.                         |             |                                                                                                                                                                                                                                                                                                                                                                  |    | Fo             | *                | *          | *            | A  | 185   | 0.7974 |
| 33     | Poaceae | PMAS-AAUR-2013-352 | <i>Eragrostis atrovirens</i> (Desf.) Trin. Ex Steud.      | Ghaah       | <br><br><br><br>      |  | Fo, For        | *                | *          | *            | A  | 182   | 0.7845 |
| 34     | Poaceae | PMAS-AAUR-2013-353 | <i>Eragrostis cilianensis</i> (All.) Lut. ex F.T. Hubbard | Ghaa        | <br><br><br><br> |  | Fo, For        | *                | *          | *            | A  | 147   | 0.6336 |
| 35     | Poaceae | PMAS-AAUR-2013-354 | <i>Eragrostis ciliaris</i> (L.) R. Br.                    | Ghaa        | <br>                                                                                                                                                                                                                                                                        |  | Fo             | *                | *          | *            | A  | 152   | 0.6552 |
| 36     | Poaceae | PMAS-AAUR-2013-355 | <i>Eragrostis minor</i> Host                              | Ghaa        | <br>                                                                                                                                                                                                                                                                        |  | Fo             | **               | *          | *            | A  | 223   | 0.9612 |
| 37     | Poaceae | PMAS-AAUR-2013-356 | <i>Eragrostis pilosa</i> (Linn.) P. Beauv.                |             | <br><br><br><br> |  | Fo, For        | **               | *          | *            | R  | 180   | 0.7759 |
| 38     | Poaceae | PMAS-AAUR-2013-357 | <i>Imperata cylindrica</i> (L.) Raeuschel.                | Dab Ghaas   |                                                                                                                                                                                                                                                                                                                                                                |  | Fo             | **               | *          | *            | O  | 120   | 0.5172 |

| S. No. | Family  | Voucher No         | Botanical name                                  | Local name                           | Palatable                                                                            | Fodder part                                                                           | Feeding method | Ethno veterinary | Other uses | Soil ecology | RA | FC(n) | RFC    |
|--------|---------|--------------------|-------------------------------------------------|--------------------------------------|--------------------------------------------------------------------------------------|---------------------------------------------------------------------------------------|----------------|------------------|------------|--------------|----|-------|--------|
|        |         |                    |                                                 |                                      |                                                                                      |    |                |                  |            |              |    |       |        |
| 39     | Poaceae | PMAS-AAUR-2013-358 | <i>Lasiurus indicus</i> Henr.                   | Karera                               |    |    | Fo, For        | *                | *          | Soil binder  | C  | 200   | 0.8621 |
| 40     | Poaceae | PMAS-AAUR-2013-359 | <i>Panicum panicum</i> (Retz.) Ohwi             | Juth Madhaan a/Chhimb ar/Buchri ghaa |    |   | Fo, Mf         | *                | *          | *            | C  | 146   | 0.6293 |
| 41     | Poaceae | PMAS-AAUR-2013-360 | <i>Ochthochloa compressa</i> (Forssk.) Hilu     |                                      |   |  | Fo             | *                | *          | Soil binder  | A  | 154   | 0.6638 |
| 42     | Poaceae | PMAS-AAUR-2013-361 | <i>Panicum psilopodium</i> Trin.                |                                      |   |  | Fo, For, Mf    | *                | *          | Soil binder  | C  | 123   | 0.5302 |
| 43     | Poaceae | PMAS-AAUR-2013-362 | <i>Paspalum dilatatum</i> Poir.                 | Ghaa                                 |   |  | Fo             | *                | *          | Soil binder  | C  | 129   | 0.5560 |
| 44     | Poaceae | PMAS-AAUR-2013-363 | <i>Phalaris minor</i> Retz.                     | Dumbi sitti                          |  |  | Fo             | *                | *          | *            | F  | 179   | 0.7716 |
| 45     | Poaceae | PMAS-AAUR-2013-364 | <i>Phragmites karka</i> (Retz.) Trin. ex Steud. | Narr                                 |   |  | Fo             | *                | *          | *            | C  | 177   | 0.7629 |
| 46     | Poaceae | PMAS-AAUR-2013-365 | <i>Poa annua</i> L.                             | Machhar ghaa                         |  |  | Fo             | *                | *          | *            | C  | 138   | 0.5948 |
| 47     | Poaceae | PMAS-AAUR-2013-366 | <i>Saccharum bengalense</i> Retz.               | Saroo                                |   |  | Fo, For, Mf    | *                | *          | Soil binder  | O  | 144   | 0.6207 |

bioRxiv preprint doi: <https://doi.org/10.1101/796227>; this version posted October 7, 2019. The copyright holder for this preprint (which was not certified by peer review) is the author/funder, who has granted bioRxiv a license to display the preprint in perpetuity. It is made available under aCC-BY 4.0 International license.

| S. No. | Family  | Voucher No         | Botanical name                                                          | Local name | Palatable                                                                                                                                                                                                                                                                                                                                                                                                                                       | Fodder part                                                                           | Feeding method | Ethno veterinary | Other uses  | Soil ecology | RA | FC(n) | RFC    |
|--------|---------|--------------------|-------------------------------------------------------------------------|------------|-------------------------------------------------------------------------------------------------------------------------------------------------------------------------------------------------------------------------------------------------------------------------------------------------------------------------------------------------------------------------------------------------------------------------------------------------|---------------------------------------------------------------------------------------|----------------|------------------|-------------|--------------|----|-------|--------|
|        |         |                    |                                                                         |            |                                                                                                                                                                                                                                                                                                                                                                |                                                                                       |                |                  |             |              |    |       |        |
| 48     | Poaceae | PMAS-AAUR-2013-367 | <i>Saccharum spontaneum</i> L.                                          | Saroo      | <br>                                                                                                                                                                                                                                                                          |    | Fo, For, Mf    | *<br>*<br>*      | *<br>*<br>* | Soil binder  | O  | 199   | 0.8578 |
| 49     | Poaceae | PMAS-AAUR-2013-368 | <i>Schismus arabicus</i> Nees                                           | Ghaa       |                                                                                                                                                                                                                                                                                                                                                                |    | Fo             | *                | *           | Soil binder  | A  | 143   | 0.6164 |
| 50     | Poaceae | PMAS-AAUR-2013-369 | <i>Setaria intermedia</i> Roem. & Schult                                |            |                                                                                                                                                                                                                                                                                                                                                                |    | Fo             | *                | *           | Soil binder  | A  | 142   | 0.6121 |
| 51     | Poaceae | PMAS-AAUR-2013-370 | <i>Setaria pumila</i> (Poir.) Roem. & Schult                            |            |                                                                                                                                                                                                                                                                                                                                                                |    |                | *                | *           | Soil binder  | F  | 169   | 0.7284 |
| 52     | Poaceae | PMAS-AAUR-2013-371 | <i>Sorghum bicolor</i> (Linn.) Moench.                                  | Milo       | <br><br><br><br>    |  | Fo, For, Mf    | *<br>*<br>*      | *<br>*<br>* | *            | A  | 169   | 0.7284 |
| 53     | Poaceae | PMAS-AAUR-2013-372 | <i>Sorghum</i> Sect. <i>Sorghum</i> Subsect. <i>Arundinacea</i> Moench. | Milo       | <br><br><br><br> |  | Fo, Mf         | *                | *<br>*<br>* | *            | A  | 150   | 0.6466 |
| 54     | Poaceae | PMAS-AAUR-2013-373 | <i>Sporobolus arabicus</i> Boiss.                                       |            | <br><br><br><br> |  | Fo             | *                | *<br>*<br>* | *            | A  | 219   | 0.9440 |
| 55     | Poaceae | PMAS-AAUR-2013-374 | <i>Stipagrostis plumosa</i> (Linn.) Munro ex T.                         | Chita gah  | <br>                                                                                                                                                                                                                                                                      |  | Fo             | *                | *           | Soil binder  | F  | 137   | 0.5905 |
| 56     | Poaceae | PMAS-AAUR-2013-375 | <i>Themeda anathera</i>                                                 |            |                                                                                                                                                                                                                                                                                                                                                              |  | Fo, For        | *                | *           | *            | F  | 126   | 0.5431 |



| S. No. | Family    | Voucher No         | Botanical name                                | Local name | Palatable                                                                                                                                                                  | Fodder part                                                                           | Feeding method | Ethno veterinary | Other uses | Soil ecology | RA | FC(n) | RFC    |
|--------|-----------|--------------------|-----------------------------------------------|------------|----------------------------------------------------------------------------------------------------------------------------------------------------------------------------|---------------------------------------------------------------------------------------|----------------|------------------|------------|--------------|----|-------|--------|
|        |           |                    |                                               |            |                                                                                           |                                                                                       |                |                  |            |              |    |       |        |
| 57     | Poaceae   | PMAS-AAUR-2013-376 | <i>Themeda triandra</i> Forsk.                |            | <br>     |    | Fo, For        | *                | *          | *            | R  | 167   | 0.7198 |
| 58     | Poaceae   | PMAS-AAUR-2013-377 | <i>Tragus roxburghii</i> Panigrahi            | Ghaa       | <br>     |    | Fo             | *                | <br>*<br>* | *            | A  | 192   | 0.8276 |
| 59     | Poaceae   | PMAS-AAUR-2013-378 | <i>Trisetum clarkei</i> (Hook f.) R. S. Singh |            | <br>     |    | Fo             | *                | *          | Soil binder  | R  | 142   | 0.6121 |
| 60     | Poaceae   | PMAS-AAUR-2013-379 | <i>Vetiveria zizanioides</i> (Linn.) Nash     |            | <br>  |  | Fo, For        | *                | *          | *            | R  | 118   | 0.5086 |
| 61     | Typhaceae | PMAS-AAUR-2013-380 | <i>Typha elephantina</i> Roxb.                | Kundar     | <br> |  | Fo, For, Mf    | *                | <br>*<br>* | *            | F  | 227   | 0.9784 |

 Whole plant  
  Leaves  
  Areal parts  
  Juvenile stage  
  , Cow  , Buffalo  , Goat  , Sheep  
 , Camel  , Rabbit  , Porcupine   
 \*  
 \*  
 Yes \*, NA \*, Fo, Fodder, For, Forage, Mf, Mix with feed, Goat, RA Relative abundance, A Abundant, C Common, F Frequent, O Occasional, R Rare

**Table 5: Pairwise comparison (PWC) base on similar RFC vales of fodder grasses**

| Fodder grasses                                 | Total gained % points | Rank |
|------------------------------------------------|-----------------------|------|
| <b>GROUP A (RFC =0.9957-0.9009)</b>            |                       |      |
| <i>Cymbopogon jwarancusa subsp. jwarancusa</i> | 88.2                  | 1st  |
| <i>Typha elephantina</i>                       | 87.3                  | 2nd  |
| <i>Cynodon dactylon</i>                        | 87.1                  | 3rd  |
| <i>Cenchrus ciliaris</i>                       | 85.1                  | 4th  |
| <i>Cyperus alopecuroides</i>                   | 84                    | 5th  |
| <b>GROUP B (RFC =0.8879-0.8103)</b>            |                       |      |
| <i>Cenchrus pennisetiformis</i>                | 72.5                  | 1st  |
| <i>Lasiurus indicus</i>                        | 63.5                  | 2nd  |
| <i>Saccharum spontaneum</i>                    | 62.4                  | 3rd  |
| <i>Tragus roxburghii</i>                       | 60.9                  | 4th  |
| <b>GROUP C (RFC =0.7974-0.6940)</b>            |                       |      |
| <i>Enneapogon persicus</i>                     | 77.9                  | 1st  |
| <i>Eragrostis atrovirens</i>                   | 76.8                  | 2nd  |
| <i>Eragrostis pilosa</i>                       | 72.1                  | 3rd  |
| <i>Phalaris minor</i>                          | 70.1                  | 4th  |
| <i>Phragmites karka</i>                        | 61.1                  | 5th  |
| <b>GROUP D (RFC =0.6897-0.6121)</b>            |                       |      |
| <i>Brachiaria ovalis</i>                       | 72.1                  | 1st  |
| <i>Dichanthium annulatum</i>                   | 60.3                  | 2nd  |
| <i>Aristida adscensionis</i>                   | 59.9                  | 3rd  |
| <i>Bromus sericeus</i>                         | 58.7                  | 4th  |
| <i>Celotia argentea</i>                        | 55.9                  | 5th  |
| <b>GROUP E (RFC =0.6034-0.6)</b>               |                       |      |
| <i>Bromus pectinatus</i>                       | 92.8                  | 1st  |
| <i>Fimbristylis quinquangularis</i>            | 90.5                  | 2nd  |
| <i>Poa annua</i>                               | 85.2                  | 3rd  |
| <i>Stipagrostis plumosa</i>                    | 76.9                  | 4th  |
| <b>GROUP F (RFC =0.5431-0.5086)</b>            |                       |      |
| <i>Themeda anathera</i>                        | 59.1                  | 1st  |
| <i>Cenchrus setigerus</i>                      | 55.6                  | 2nd  |
| <i>Cyperus imbricatus</i>                      | 54.9                  | 3rd  |
| <i>Digitaria ciliaris</i>                      | 52.3                  | 4th  |

**Table 6: Frequency analysis for palatability, parts used for eating and feeding methods and relative abundance of fodder grasses**

| Studied parameters              | Frequency | Valid percent | Cumulative percent |
|---------------------------------|-----------|---------------|--------------------|
| Co, Bu, Sh, Go, Ra              | 1         | 1.64          | 1.64               |
| Co, Bu, Sh, Go                  | 6         | 9.84          | 11.48              |
| Co, Bu, Sh, Go, Ra              | 4         | 6.56          | 18.03              |
| Go, Sh, Co                      | 3         | 4.92          | 22.95              |
| Go, Sh                          | 20        | 32.79         | 55.74              |
| Go, Sh, Co, Cm                  | 1         | 1.64          | 57.38              |
| Co, Bu, Sh, Go, Cm              | 11        | 18.03         | 75.41              |
| Bu, Sh, Go                      | 1         | 1.64          | 77.05              |
| Co, Bu                          | 8         | 13.11         | 81.97              |
| Go                              | 9         | 14.75         | 96.72              |
| Sh                              | 2         | 3.28          | 100                |
| <b>Total</b>                    | <b>61</b> | <b>100</b>    |                    |
| Whole plant                     | 42        | 68.85         | 68.85              |
| Leaves                          | 4         | 6.56          | 75.41              |
| Juvenile                        | 2         | 3.28          | 78.69              |
| Aerial, whole plant at Juvenile | 1         | 1.64          | 80.33              |
| Aerial, Juvenile                | 2         | 3.28          | 83.61              |
| Aerial and leaves               | 2         | 3.28          | 86.89              |
| Aerial                          | 8         | 13.11         | 100.00             |
| <b>Total</b>                    | <b>61</b> | <b>100</b>    |                    |
| Fo                              | 31        | 50.82         | 50.82              |
| Fo,For, Mf                      | 7         | 11.48         | 62.30              |
| Fo, Mf                          | 21        | 34.43         | 96.72              |
| Fo,Mf                           | 2         | 3.28          | 100.00             |
| <b>Total</b>                    | <b>61</b> | <b>100</b>    |                    |
| Abundant                        | 30        | 49.18         | 49.18              |
| Common                          | 13        | 21.31         | 70.49              |
| Frequent                        | 9         | 14.75         | 85.25              |
| Occasional                      | 5         | 8.20          | 93.44              |
| Rare                            | 4         | 6.56          | 100                |
| <b>Total</b>                    | <b>61</b> | <b>100</b>    |                    |

Key: Co (Cow), Bu (Buffalo), Sh (Sheep), Go (Goat), Ra (Rabbit), Cm (Camel), Fo (Fodder), For (Forage) , Mf (Mix Fodder)



**Table 7: Results of ANTHROPAC analysis of overall salience index of milk producing species**

| S. No. | Botanical name                      | Inverted Rank/Total Listed = Smith's Salience Index |        |       |        |        |        |        |        |        |        | Illness<br>Σ | Composite<br>Salience Σ/n (n<br>= 10) |
|--------|-------------------------------------|-----------------------------------------------------|--------|-------|--------|--------|--------|--------|--------|--------|--------|--------------|---------------------------------------|
|        |                                     | (SS1)                                               | (SS2)  | (SS3) | (SS4)  | (SS5)  | (SS6)  | (SS7)  | (SS8)  | (SS9)  | (SS10) |              |                                       |
| 1      | <i>Cynodon dactylon</i>             | 1                                                   |        | 0.96  |        | 0.9    | 0.883  |        | 1      | 0.867  | 0.85   | 6.46         | 0.6460                                |
| 2      | <i>Cymbopogon jwarancusa</i>        | 0.933                                               | 1      |       | 1      | 0.15   |        | 0.3    | 0.883  |        | 0.867  | 5.133        | 0.5133                                |
| 3      | <i>Sorghum</i> Sect. <i>Sorghum</i> | 0.96                                                | 1.00   |       | 0.82   | 0.67   | 0.4    | 0.4    | 0.21   | 0.34   | 0.321  | 5.121        | 0.5121                                |
| 4      | <i>Cenchrus ciliaris</i>            | 0.933                                               |        | 0.75  | 0.933  | 0.42   | 0.51   | 0.51   |        | 0.4    | 0.15   | 4.606        | 0.4606                                |
| 5      | <i>Typha elephantina</i>            | 0.933                                               | 0.96   | 0.321 | 0.05   | 0.75   | 0.3    | 0.152  | 0.04   | 0.321  | 0.058  | 3.885        | 0.3885                                |
| 6      | <i>Eragrostis minor</i>             | 0.867                                               |        | 0.34  |        | 0.867  | 0.82   |        | 0.017  | 0.82   |        | 3.731        | 0.3731                                |
| 7      | <i>Brachiaria reptans</i>           | 0.62                                                | 0.72   | 0.321 | 0.05   | 0.75   | 0.3    | 0.152  | 0.04   | 0.321  | 0.058  | 3.332        | 0.3332                                |
| 8      | <i>Brachiaria distachya</i>         | 0.62                                                | 0.72   | 0.321 | 0.05   | 0.75   | 0.3    | 0.152  | 0.04   | 0.321  | 0.058  | 3.279        | 0.3279                                |
| 9      | <i>Aristida funiculata</i>          |                                                     | 0.82   | 0.67  |        |        | 0.083  | 0.768  |        | 0.083  | 0.833  | 3.257        | 0.3257                                |
| 10     | <i>Cenchrus pennisetiformis</i>     | 0.833                                               |        | 0.767 | 0.096  | 0.073  |        | 0.767  | 0.096  | 0.073  | 0.767  | 3.472        | 0.3472                                |
| 11     | <i>Lasiurus indicus</i>             | 0.076                                               | 0.017  | 0.8   | 0.0764 | 0.0432 | 0.054  | 0.098  | 0.76   | 0.87   | 0.0973 | 2.8919       | 0.2892                                |
| 12     | <i>Saccharum spontaneum</i>         | 0.767                                               | 0.82   | 0.67  |        | 0.017  |        |        | 0.3    | 0.152  | 0.04   | 2.766        | 0.2766                                |
| 13     | <i>Tragus roxburghii</i>            | 0.021                                               | 0.02   | 0.031 | 0.768  | 0.8    | 0.0764 | 0.017  | 0.767  | 0.096  | 0.017  | 2.6154       | 0.2615                                |
| 14     | <i>Brachiaria eruciformis</i>       | 0.769                                               | 0.767  | 0.096 | 0.073  | 0.083  | 0.098  | 0.063  | 0.65   |        |        | 2.599        | 0.2599                                |
| 15     | <i>Dactyloctenium aristatum</i>     |                                                     | 0.017  | 0.767 | 0.096  | 0.073  | 0.57   | 0.767  | 0.096  | 0.017  |        | 2.403        | 0.2403                                |
| 16     | <i>Desmostachya bipinnata</i>       | 0.733                                               |        | 0.82  | 0.67   |        | 0.017  |        |        | 0.083  |        | 2.323        | 0.2323                                |
| 17     | <i>Enneapogon persicus</i>          |                                                     |        | 0.734 | 0.083  | 0.15   | 0.07   | 0.0631 | 0.023  | 0.421  | 0.51   | 2.0541       | 0.2054                                |
| 18     | <i>Eragrostis atrovirens</i>        | 0.735                                               | 0.03   | 0.042 | 0.15   | 0.768  | 0.12   | 0.032  | 0.027  | 0.053  | 0.0564 | 2.0154       | 0.2015                                |
| 19     | <i>Eragrostis pilosa</i>            | 0.0432                                              | 0.054  | 0.15  | 0.076  | 0.217  | 0.717  | 0.021  | 0.52   | 0.031  | 0.096  | 1.9252       | 0.1925                                |
| 20     | <i>Phalaris minor</i>               | 0.8                                                 | 0.0764 | 0.017 |        | 0.083  | 0.033  | 0.05   | 0.032  | 0.083  | 0.7    | 1.8744       | 0.1874                                |
| 21     | <i>Phragmites karka</i>             | 0.701                                               | 0.01   | 0.023 | 0.74   | 0.15   | 0.07   | 0.0631 | 0.023  |        | 0.032  | 1.8161       | 0.1816                                |
| 22     | <i>Pycnus flavidus</i>              |                                                     |        | 0.683 | 0.096  | 0.01   | 0.023  | 0.23   | 0.7    | 0.032  | 0.027  | 1.805        | 0.1805                                |
| 23     | <i>Setaria pumila</i>               | 0.65                                                |        | 0.15  | 0.07   | 0.0631 |        | 0.7    | 0.07   | 0.0631 | 0.023  | 1.7892       | 0.1789                                |
| 24     | <i>Sorghum bicolor</i>              | 0.0764                                              | 0.0432 | 0.054 | 0.651  | 0.217  | 0.15   | 0.07   | 0.0631 | 0.017  | 0.437  | 1.7787       | 0.1779                                |
| 25     | <i>Themeda triandra</i>             |                                                     |        |       |        | 0.68   | 0.076  | 0.23   | 0.117  | 0.021  | 0.652  | 1.776        | 0.1776                                |
| 26     | <i>Vetiveria zizanioides</i>        |                                                     |        | 0.617 |        | 0.15   | 0.07   | 0.0631 | 0.7    |        |        | 1.6001       | 0.1600                                |
| 27     | <i>Cyperus difformis</i>            | 0.6                                                 |        |       | 0.0432 | 0.054  | 0.15   | 0.076  | 0.217  |        | 0.43   | 1.5702       | 0.1570                                |
| 28     | <i>Dactyloctenium aegyptium</i>     | 0.0432                                              | 0.054  | 0.651 | 0.567  |        | 0.0764 | 0.017  |        | 0.027  | 0.07   | 1.5056       | 0.1506                                |
| 29     | <i>Brachiaria ovalis</i>            | 0.13                                                | 0.51   |       | 0.0764 | 0.0432 | 0.054  | 0.651  |        | 0.017  |        | 1.4816       | 0.1482                                |
| 30     | <i>Dichanthium annulatum</i>        | 0.132                                               | 0.242  | 0.517 | 0.15   | 0.076  | 0.017  | 0.15   | 0.07   | 0.0631 | 0.023  | 1.4401       | 0.1440                                |
| 31     | <i>Aristida adscensionis</i>        | 0.5                                                 | 0.142  |       | 0.251  | 0.217  |        | 0.01   | 0.023  | 0.23   | 0.017  | 1.394        | 0.1394                                |
| 32     | <i>Bromus sericeus</i>              |                                                     | 0.054  |       | 0.45   |        |        | 0.083  | 0.054  | 0.051  | 0.567  | 1.259        | 0.1259                                |
| 33     | <i>Celotia argentea</i>             | 0.433                                               |        |       |        | 0.0432 | 0.054  | 0.051  | 0.567  |        | 0.0764 | 1.2246       | 0.1225                                |
| 34     | <i>Ochthochloa compressa</i>        | 0.076                                               | 0.23   | 0.4   | 0.071  |        | 0.083  | 0.0764 |        | 0.0432 | 0.054  | 1.0336       | 0.1034                                |
| 35     | <i>Eragrostis ciliaris</i>          | 0.367                                               |        | 0.076 | 0.23   | 0.14   | 0.07   |        | 0.15   | 0.083  |        | 1.116        | 0.1116                                |
| 36     | <i>Cyperus alopecuroides</i>        |                                                     | 0.251  |       | 0.333  | 0.0432 | 0.054  | 0.051  | 0.05   | 0.025  | 0.142  | 0.9492       | 0.0949                                |
| 37     | <i>Chloris gayana</i>               | 0.3                                                 | 0.142  | 0.071 |        | 0.01   | 0.023  | 0.23   | 0.017  | 0.0631 | 0.023  | 0.8831       | 0.0883                                |
| 38     | <i>Eragrostis cilianensis</i>       | 0.051                                               |        | 0.083 | 0.076  | 0.023  | 0.4    | 0.071  | 0.051  | 0.05   |        | 0.805        | 0.0805                                |

bioRxiv preprint doi: <https://doi.org/10.1101/796227>; this version posted October 7, 2019. The copyright holder for this preprint (which was not certified by peer review) is the author/funder, who has granted bioRxiv a license to display the preprint in perpetuity. It is made available under aCC-BY 4.0 International license.



| S. No. | Botanical name                      | Inverted Rank/Total Listed = Smith's Saliency Index |        |        |        |        |        |        |        |        |        | Illness<br>Σ | Composite<br>Saliency Σ/n (n<br>= 10) |
|--------|-------------------------------------|-----------------------------------------------------|--------|--------|--------|--------|--------|--------|--------|--------|--------|--------------|---------------------------------------|
|        |                                     | (SS1)                                               | (SS2)  | (SS3)  | (SS4)  | (SS5)  | (SS6)  | (SS7)  | (SS8)  | (SS9)  | (SS10) |              |                                       |
| 39     | <i>Leptochloa panicea</i>           | 0.284                                               | 0.026  | 0.0432 | 0.054  |        | 0.14   | 0.07   | 0.083  | 0.054  | 0.033  | 0.7872       | 0.0787                                |
| 40     | <i>Saccharum bengalense</i>         | 0.02                                                | 0.0710 | 0.055  | 0.046  | 0.0532 | 0.064  | 0.25   | 0.01   | 0.083  | 0.054  | 0.7142       | 0.0714                                |
| 41     | <i>Schismus arabicus</i>            | 0.2                                                 |        |        | 0.061  |        | 0.05   | 0.083  | 0.076  | 0.023  | 0.22   | 0.713        | 0.0713                                |
| 42     | <i>Setaria intermedia</i>           | 0.055                                               | 0.067  |        | 0.183  |        | 0.0132 | 0.211  | 0.071  | 0.051  | 0.05   | 0.7012       | 0.0701                                |
| 43     | <i>Trisetum clarkei</i>             | 0.167                                               |        | 0.233  | 0.0432 | 0.054  | 0.026  | 0.0432 | 0.054  | 0.011  | 0.04   | 0.6714       | 0.0671                                |
| 44     | <i>Bromus pectinatus</i>            |                                                     | 0.14   | 0.15   |        |        | 0.017  | 0.117  | 0.15   | 0.076  | 0.017  | 0.667        | 0.0667                                |
| 45     | <i>Fimbristylis quinquangularis</i> | 0.151                                               |        | 0.0432 |        | 0.046  | 0.0532 | 0.064  | 0.25   | 0.017  |        | 0.6244       | 0.0624                                |
| 46     | <i>Poa annua</i>                    | 0.071                                               | 0.051  | 0.05   |        | 0.017  | 0.233  | 0.0432 | 0.152  |        |        | 0.6172       | 0.0617                                |
| 47     | <i>Stipagrostis plumosa</i>         | 0.117                                               |        | 0.017  | 0.071  | 0.051  | 0.05   | 0.017  |        | 0.233  | 0.0432 | 0.5992       | 0.0599                                |
| 48     | <i>Aeluropus lagopoides</i>         | 0.055                                               | 0.161  | 0.0432 | 0.054  | 0.011  | 0.033  | 0.055  | 0.026  | 0.0432 | 0.054  | 0.5354       | 0.0535                                |
| 49     | <i>Cyperus digitatus</i>            | 0.1                                                 | 0.023  | 0.046  | 0.0532 | 0.064  |        | 0.05   | 0.0710 | 0.055  | 0.046  | 0.5082       | 0.0508                                |
| 50     | <i>Paspalum dilatatum Poir.</i>     | 0.032                                               | 0.042  | 0.217  | 0.102  |        | 0.046  |        | 0.046  | 0.017  |        | 0.502        | 0.0502                                |
| 51     | <i>Themeda anathera</i>             | 0.0432                                              | 0.054  | 0.011  | 0.033  | 0.25   |        |        | 0.083  |        |        | 0.4742       | 0.0474                                |
| 52     | <i>Cenchrus setigerus</i>           | 0.0432                                              | 0.054  | 0.017  | 0.0432 | 0.054  | 0.071  | 0.051  | 0.05   |        | 0.084  | 0.4674       | 0.0467                                |
| 53     | <i>Cyperus imbricatus</i>           |                                                     | 0.051  |        | 0.067  |        | 0.071  | 0.051  |        | 0.0432 | 0.152  | 0.4352       | 0.0435                                |
| 54     | <i>Digitaria ciliaris</i>           |                                                     |        |        |        |        | 0.067  | 0.233  | 0.0432 | 0.054  | 0.026  | 0.4232       | 0.0423                                |
| 55     | <i>Eleusine indica</i>              | 0.05                                                | 0.0432 | 0.233  |        |        | 0.026  |        | 0.054  |        |        | 0.4062       | 0.0406                                |
| 56     | <i>Cyperus rotundus</i>             | 0.01                                                |        | 0.05   | 0.017  | 0.071  | 0.011  | 0.033  | 0.055  | 0.0710 | 0.055  | 0.373        | 0.0373                                |
| 57     | <i>Cenchrus biflorus</i>            | 0.033                                               | 0.017  | 0.0432 | 0.054  | 0.011  | 0.054  | 0.064  | 0.0432 | 0.017  | 0.011  | 0.3474       | 0.0347                                |
| 58     | <i>Panicum psilopodium</i>          | 0.033                                               | 0.017  | 0.071  | 0.051  | 0.05   |        | 0.033  | 0.033  | 0.033  |        | 0.321        | 0.0321                                |
| 59     | <i>Pycnus sanguin</i>               | 0.011                                               | 0.031  | 0.055  | 0.0110 | 0.023  | 0.011  | 0.033  | 0.055  | 0.0710 | 0.017  | 0.318        | 0.0318                                |
| 60     | <i>Imperata cylindrica</i>          | 0.017                                               |        | 0.033  |        | 0.011  |        | 0.046  | 0.0532 | 0.064  | 0.055  | 0.2792       | 0.0279                                |
| 61     | <i>Arundo Donax</i>                 | 0.018                                               |        |        | 0.071  | 0.051  | 0.05   |        | 0.042  | 0.017  |        | 0.249        | 0.0249                                |

bioRxiv preprint doi: <https://doi.org/10.1101/796227>; this version posted October 7, 2019. The copyright holder for this preprint (which was not certified by peer review) is the author/funder, who has granted bioRxiv a license to display the preprint in perpetuity. It is made available under aCC-BY 4.0 International license.

**Table 8: Grasses use in Ethno- veterinary and Ethnobotanical**

| S. No. | Botanical name                                                              | Ethnobotanical Uses                                                                                                                                                                 | Ethno veterinary uses                                                                      |
|--------|-----------------------------------------------------------------------------|-------------------------------------------------------------------------------------------------------------------------------------------------------------------------------------|--------------------------------------------------------------------------------------------|
| 1      | <i>Aeluropus lagopoides</i> (L.)<br>Thwaites                                | Fuel                                                                                                                                                                                | ---                                                                                        |
| 2      | <i>Aristida adscensionis</i> L                                              | ---                                                                                                                                                                                 | Controls itching                                                                           |
| 3      | <i>Arundo Donax</i> L.                                                      | ---                                                                                                                                                                                 | Gastrointestinal                                                                           |
| 4      | <i>Arundo Donax</i> L.                                                      | Fencing, inkpot pen, hollow stem for announcement                                                                                                                                   | ---                                                                                        |
| 5      | <i>Brachiaria ovalis</i> Stapf                                              | Fuel                                                                                                                                                                                | ---                                                                                        |
| 6      | <i>Bromus pectinatus</i> Thumb                                              | Fuel                                                                                                                                                                                | ---                                                                                        |
| 7      | <i>Bromus sericeus</i> Drobv                                                | Fuel                                                                                                                                                                                | ---                                                                                        |
| 8      | <i>Cenchrus biflorus</i> Roxb.                                              | ---                                                                                                                                                                                 | Diuretic                                                                                   |
| 9      | <i>Cenchrus ciliaris</i> L.                                                 | Fuel                                                                                                                                                                                | Diuretic                                                                                   |
| 10     | <i>Cenchrus pennisetiformis</i><br>Hochst. & Steud.                         | Fuel                                                                                                                                                                                | ---                                                                                        |
| 11     | <i>Cenchrus setigerus</i> Vahl                                              | Fuel                                                                                                                                                                                | Diuretic                                                                                   |
| 12     | <i>Cymbopogon jwarancusa</i><br><i>subsp. jwarancusa</i> (Jones)<br>Schult. | Fumigant for measles, matrices (Chatai) for typhoid, root extract for typhus fever and cough, Seeds for chicken pox, roof thatching, roots khass for washing domestic pots/utensils | Fumigant for skin diseases, fragrance in milk, Diuretic and improve fertility in bull      |
| 13     | <i>Cynodon dactylon</i> (L.)<br>Pers.                                       | Remove pimples, feet burning sensation, fever                                                                                                                                       | Paste of leaves controls dysentery and anti-inflammatory to wounded areas of animal's body |
| 14     | <i>Cyperus digitatus</i> Roxb.                                              | Fuel                                                                                                                                                                                | ---                                                                                        |
| 15     | <i>Cyperus rotundus</i> L.                                                  | Fuel                                                                                                                                                                                | Antidiarrheal and gur function stabilizer                                                  |
| 16     | <i>Dactyloctenium aegyptium</i> (L.) Willd.                                 | ---                                                                                                                                                                                 | Used to reduce after birth abdominal pains                                                 |
| 17     | <i>Desmostachya bipinnata</i> (L.) Stapf.                                   | Broom making, Fuel                                                                                                                                                                  | Digestive disorders, Dysentery                                                             |
| 18     | <i>Dichanthium annulatum</i> (Forssk.) Stapf                                | Fuel                                                                                                                                                                                | Digestive disorders                                                                        |
| 19     | <i>Digitaria ciliaris</i> (Retz.)<br>Koel                                   | Fuel                                                                                                                                                                                |                                                                                            |
| 20     | <i>Eleusine indica</i> (L.)<br>Gaertn.                                      | ---                                                                                                                                                                                 | Cure digestive disorders                                                                   |
| 21     | <i>Eragrostis minor</i> Host                                                | ---                                                                                                                                                                                 | Digestive disorders                                                                        |

| S. No. | Botanical name                                                                | Ethnobotanical Uses                                                                                                                                                                                        | Ethno veterinary uses                                           |
|--------|-------------------------------------------------------------------------------|------------------------------------------------------------------------------------------------------------------------------------------------------------------------------------------------------------|-----------------------------------------------------------------|
| 22     | <i>Eragrostis pilosa</i> (Linn.)<br>P. Beauv.                                 | ---                                                                                                                                                                                                        | Help to cure contusion                                          |
| 23     | <i>Imperata cylindrica</i> (L.)<br>Racuschel.                                 | ---                                                                                                                                                                                                        | Fumigant for Piles                                              |
| 24     | <i>Leptochloa panicea</i><br>(Retz.) Ohwi                                     | Fuel                                                                                                                                                                                                       | ---                                                             |
| 25     | <i>Phragmites karka</i> (Retz.)<br>Trin. ex Steud.                            | Writing pen (Qalam) trunk, thatching<br>of roof, and fuel source, shoes making                                                                                                                             | ---                                                             |
| 26     | <i>Pycnus flavidus</i> (Retz.) T.<br>Koyana                                   | Fuel                                                                                                                                                                                                       | ---                                                             |
| 27     | <i>Saccharum bengalense</i><br>Retz.                                          | Culms used for making matrices,<br>chairs (Morrhe), hand fan, cages<br>(Pinjra), brooms (Jhaaru), etc. Leaves<br>used for making matrices (Chatai).<br>Leaf sheaths beaten to make strong<br>ropes (Rassi) | Leaves used to treat oral<br>problems of ruminants              |
| 28     | <i>Saccharum spontaneum</i> L.                                                | Leaves Decoction for stoppage of<br>urination (Micturition), fuel, culm<br>used for making cages, roof thatching<br>(Patalan) and ornamental goods.<br>Leaves woven to make matrices                       | Root help to relieve in<br>inflammation and urinary<br>problems |
| 29     | <i>Sorghum bicolor</i> (Linn.)<br>Moench.                                     | Fuel                                                                                                                                                                                                       | Wounds, fever, anemia<br>and constipation                       |
| 30     | <i>Sorghum</i> Sect. <i>Sorghum</i><br>Subsect. <i>Arundinacea</i><br>Moench. | Fuel                                                                                                                                                                                                       | ---                                                             |
| 31     | <i>Sporobolus arabicus</i><br>Boiss.                                          | Fuel                                                                                                                                                                                                       | ---                                                             |
| 32     | <i>Tragus roxburghii</i><br>Panigrahi                                         | Fuel                                                                                                                                                                                                       | ---                                                             |
| 33     | <i>Typha elephantina</i> Roxb.                                                | Fuel, roof thatching, ropes, matrices,<br>inflorescence medicinally importance<br>and shoes making                                                                                                         | ---                                                             |

bioRxiv preprint doi: <https://doi.org/10.1101/796227>; this version posted October 7, 2019. The copyright holder for this preprint (which was not certified by peer review) is the author/funder, who has granted bioRxiv a license to display the preprint in perpetuity. It is made available under aCC-BY 4.0 International license.
